# Supplementary material for: Metformin suppresses vascular smooth muscle cell senescence by promoting autophagic flux
Source: PubMed Central journal article supplement — J Adv Res. 2021 Dec 22;41:205–18. doi: 10.1016/j.jare.2021.12.009 (PMC9637479; doi:10.1016/j.jare.2021.12.009), 2021-12-22

Figure-1D

p53

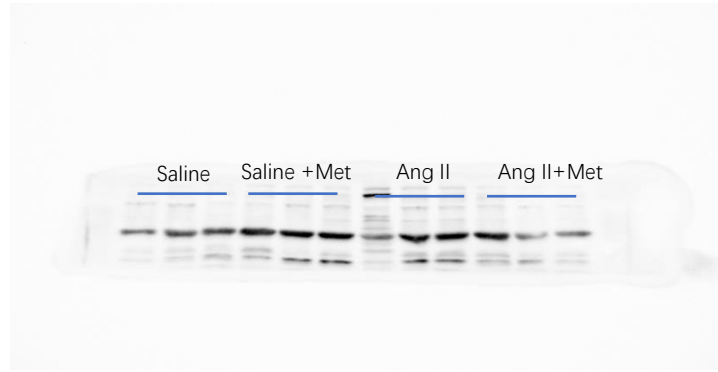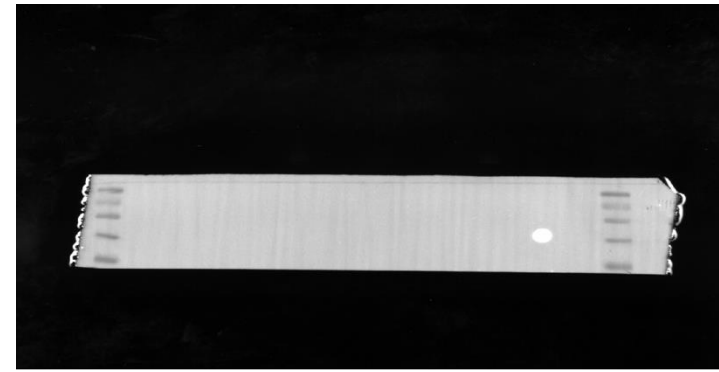

$\alpha$ -Tubulin

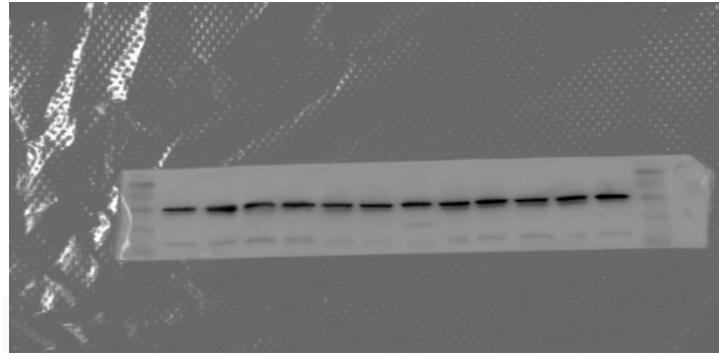

p53

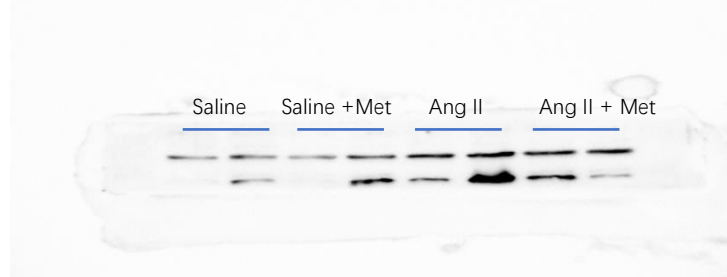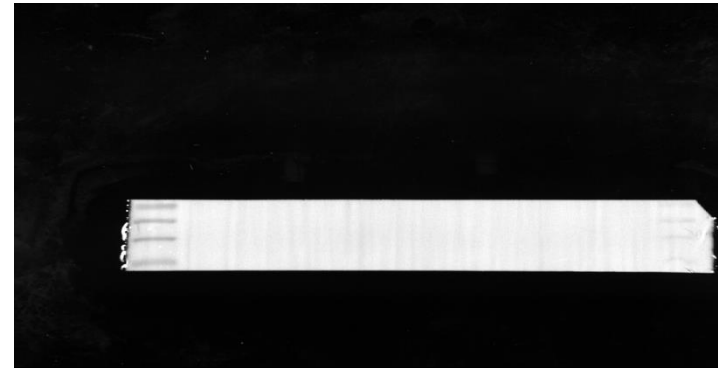

$\alpha$ -Tubulin

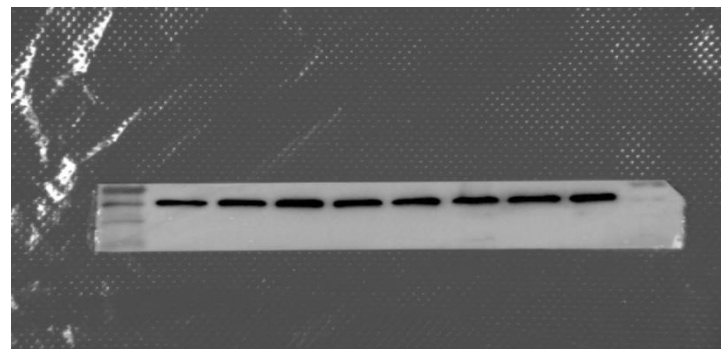

Figure-1D

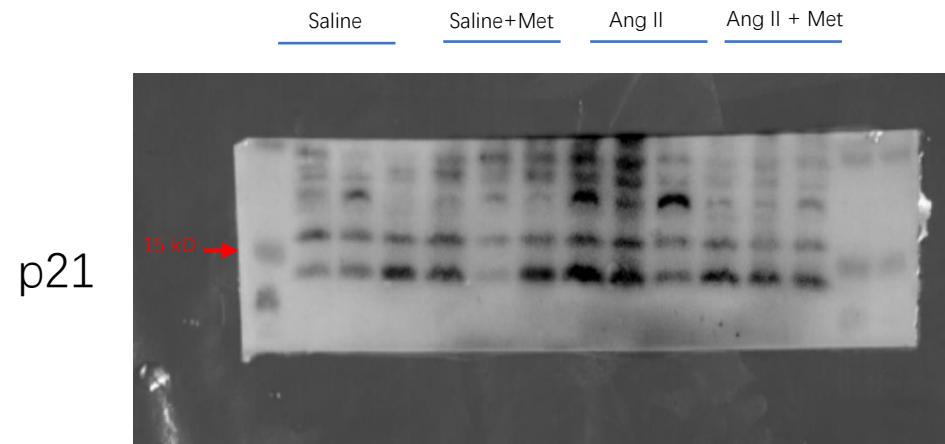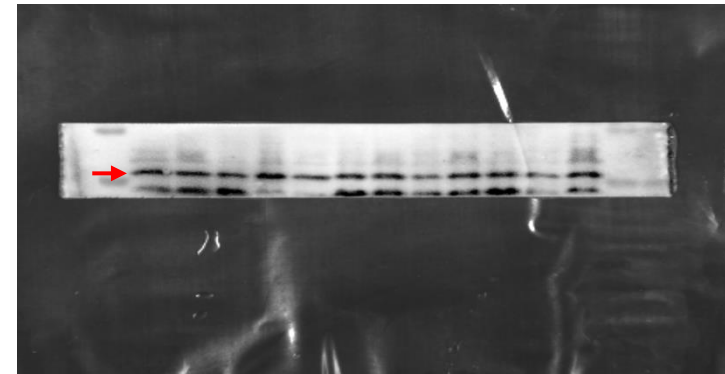

$\alpha$ -Tubulin

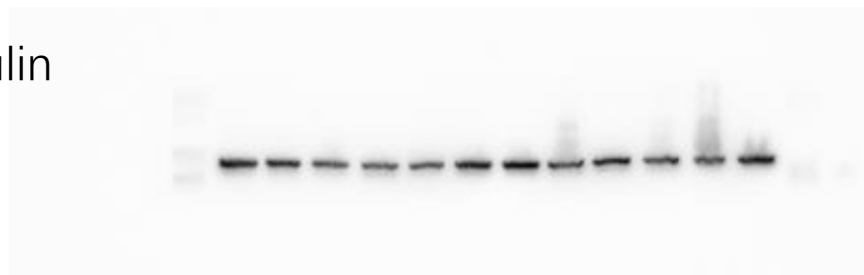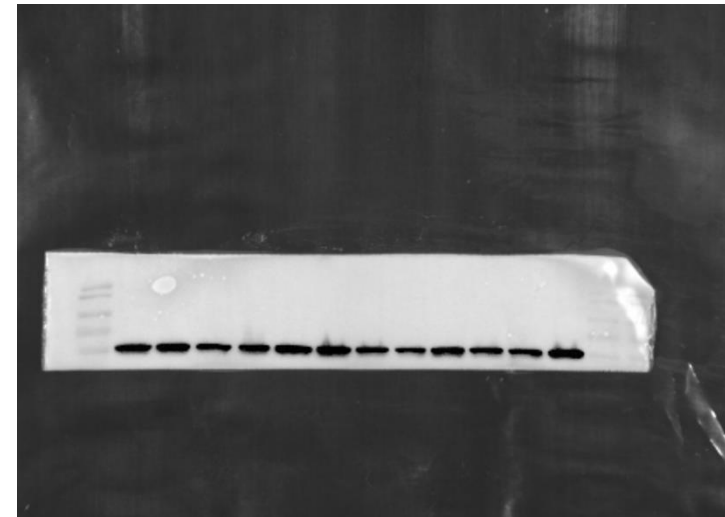

Figure 3B

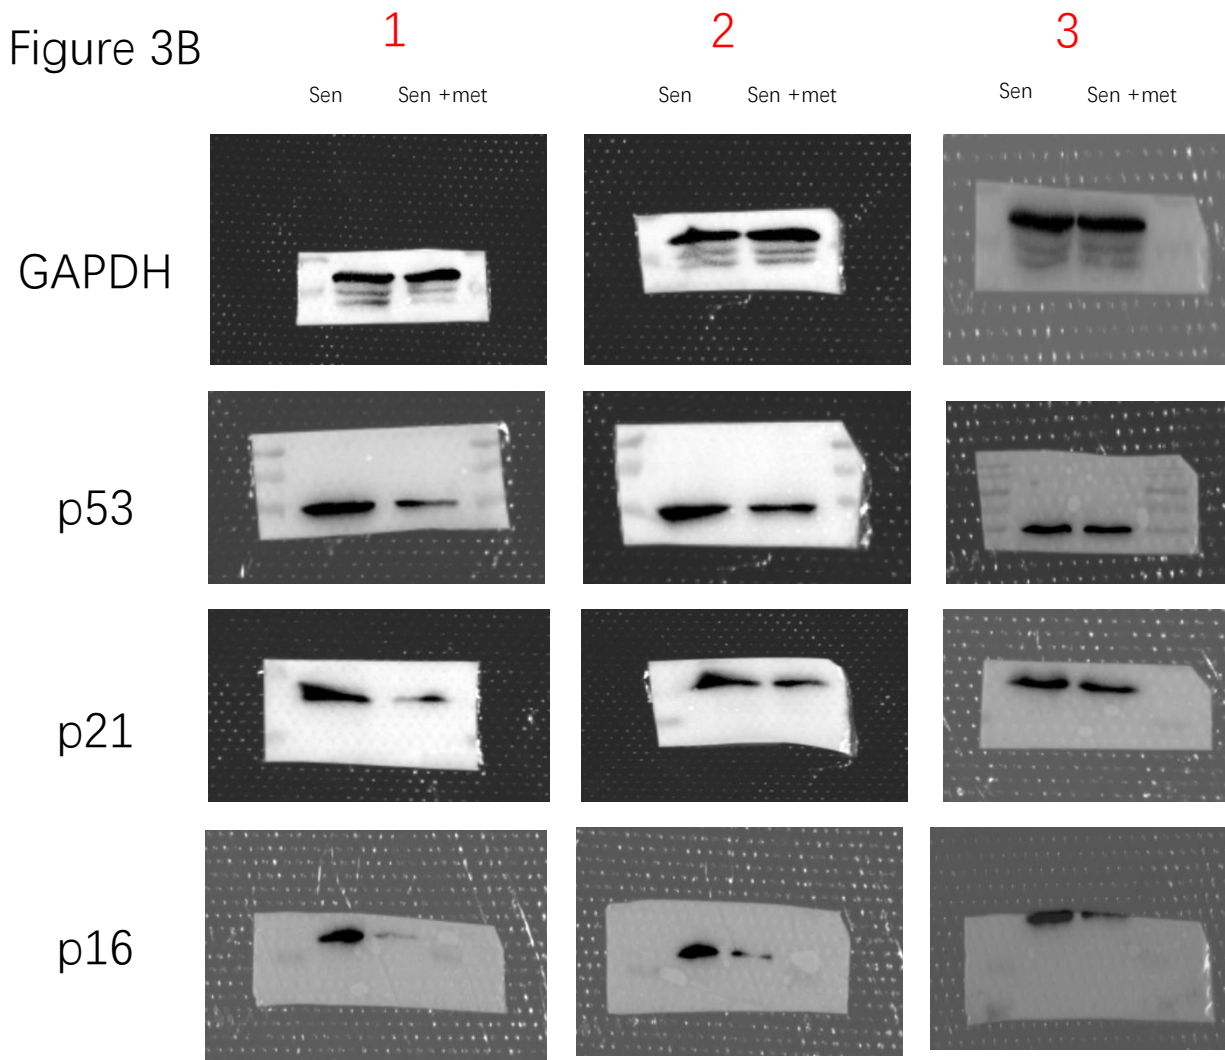

Figure 3G

1

p53

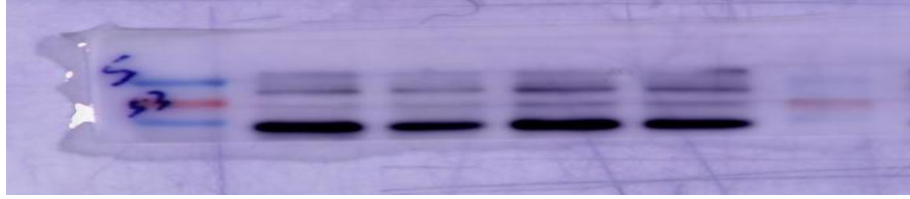

p21

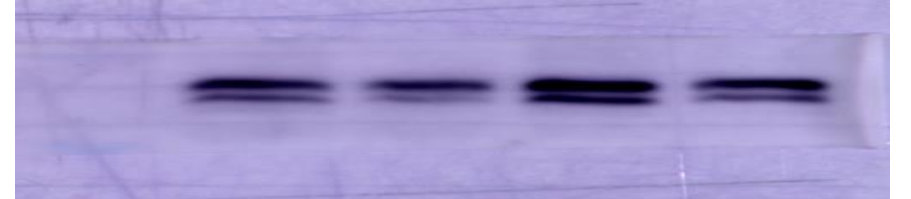

GAPDH

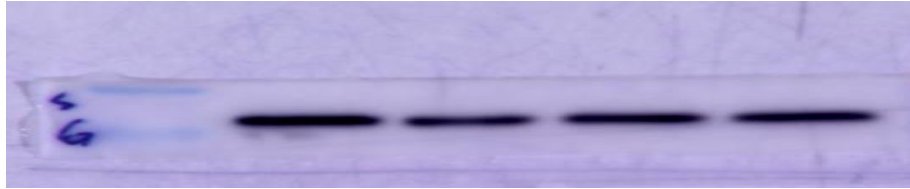

GAPDH

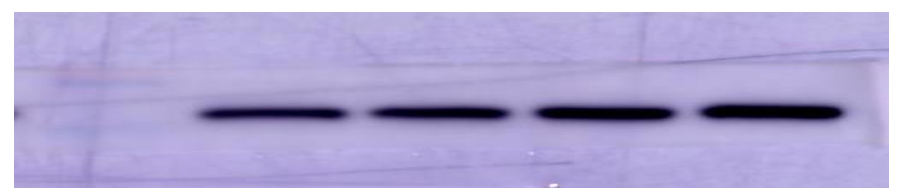

2

p53

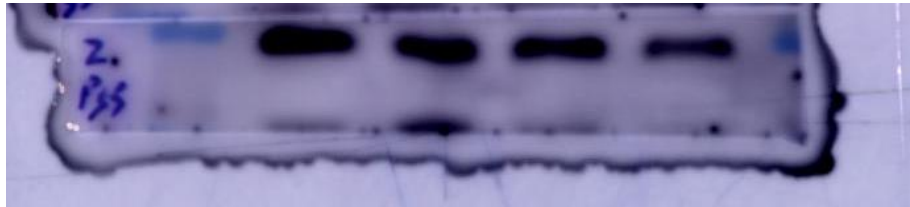

p21

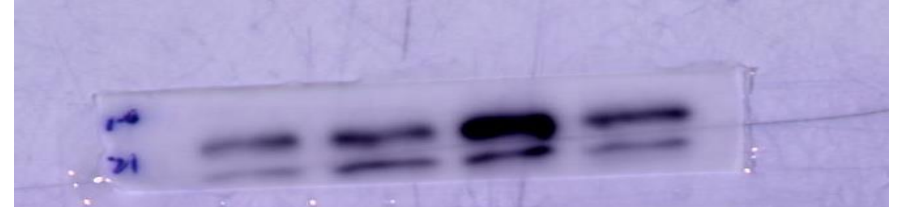

GAPDH

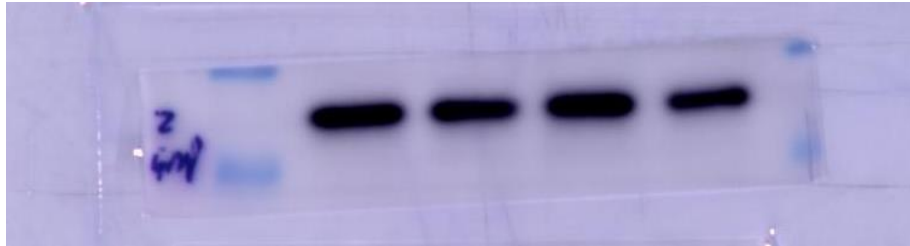

GAPDH

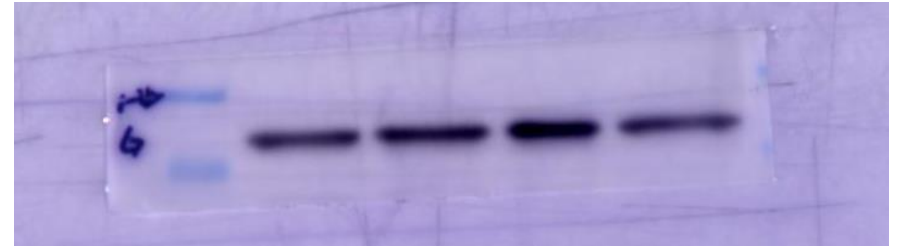

3

p53

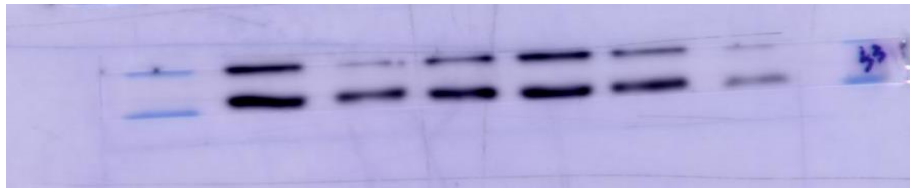

p21

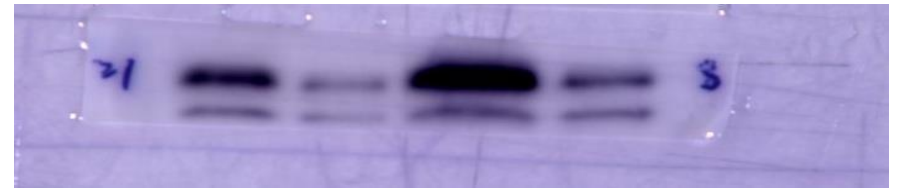

GAPDH

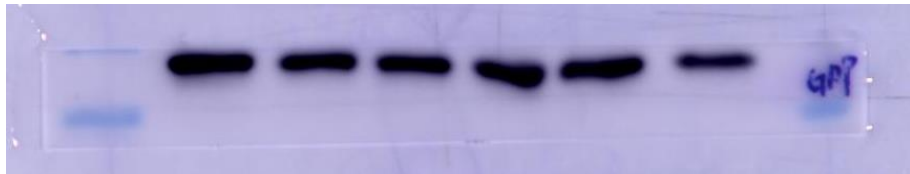

GAPDH

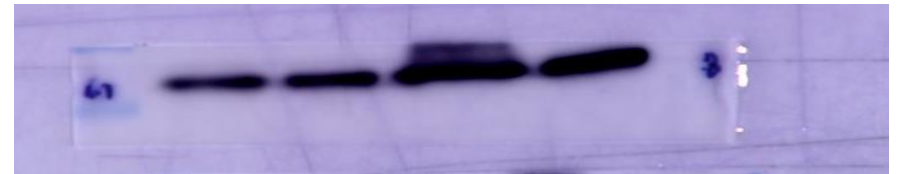

Figure 3J

IL-6

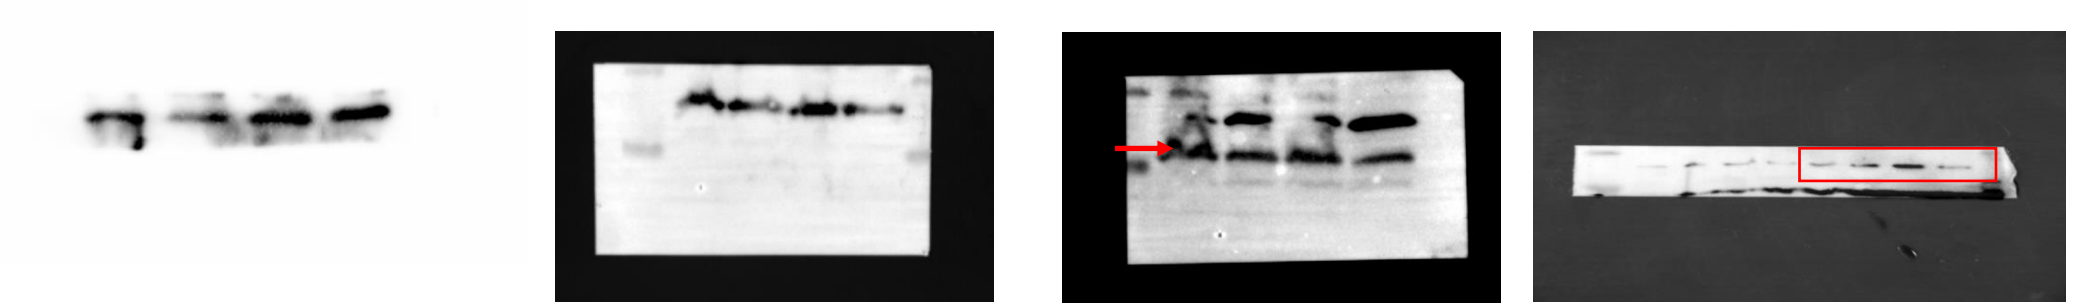

GAPDH

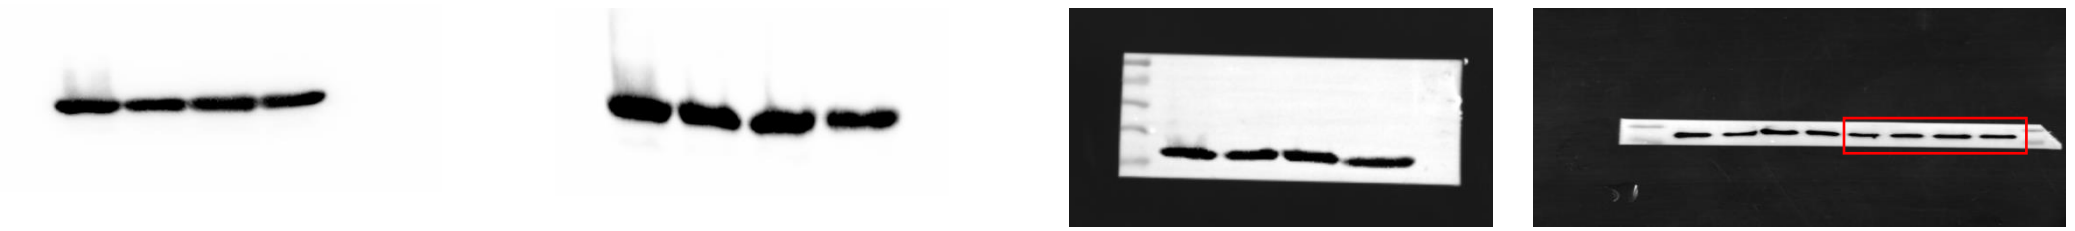

MMP-2

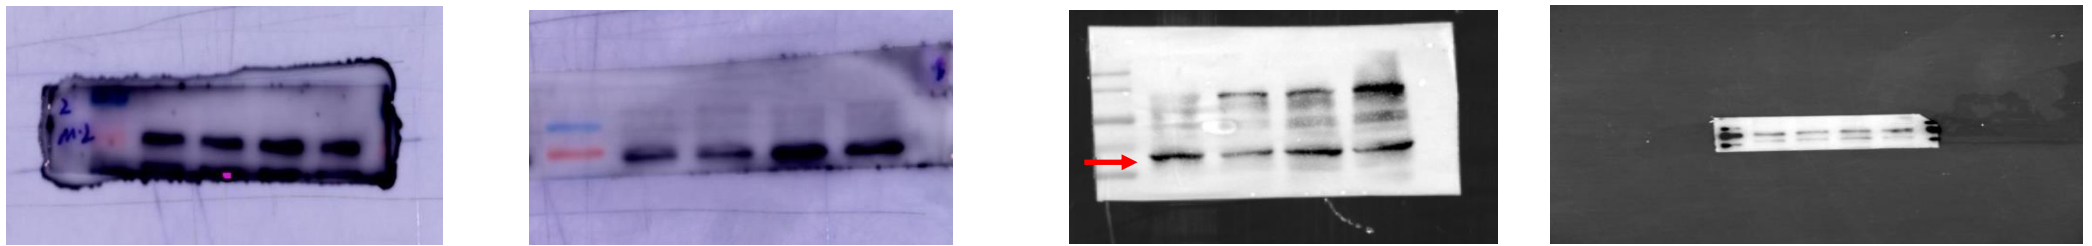

GAPDH

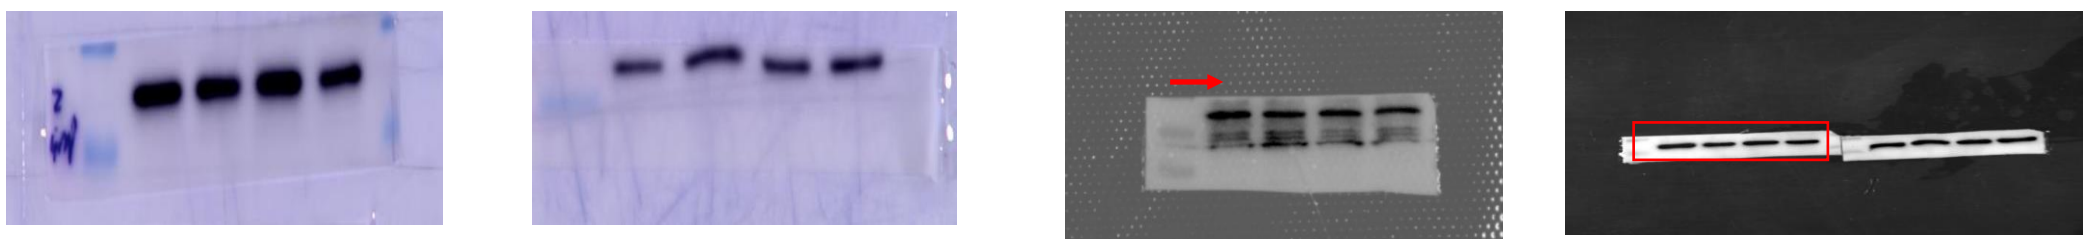

Figure 3J

1

2

3

TGF- $\beta$

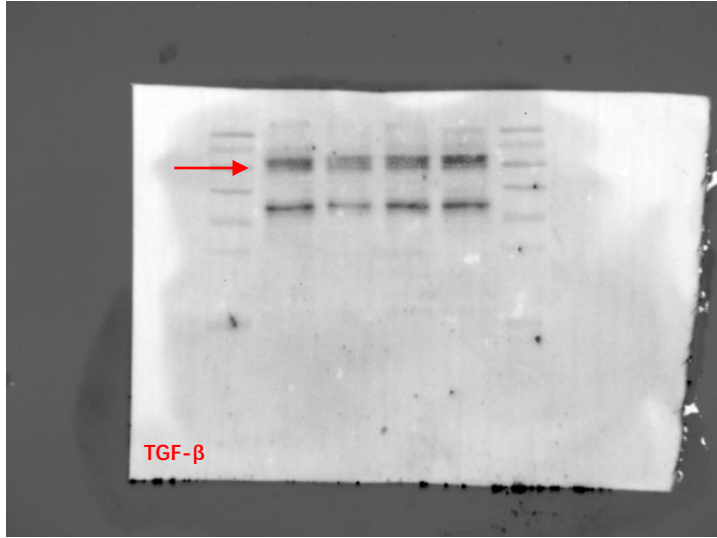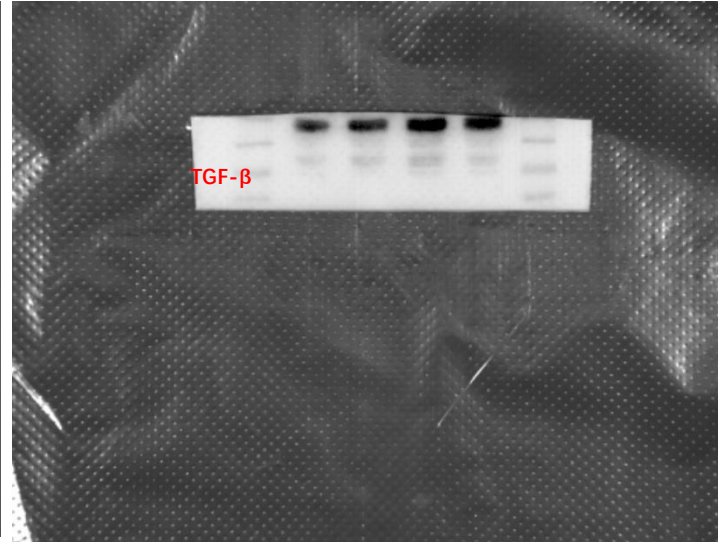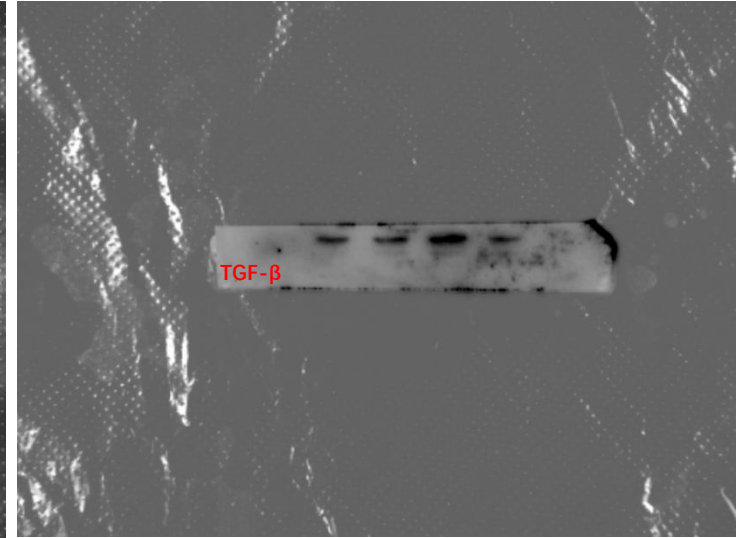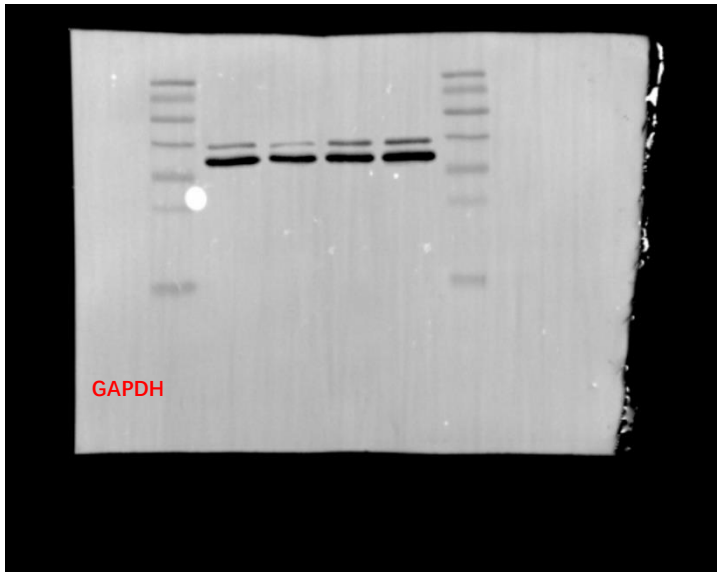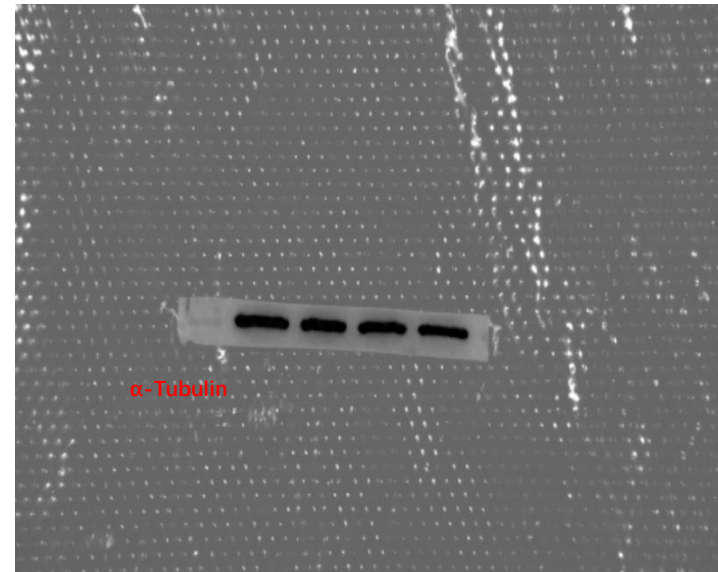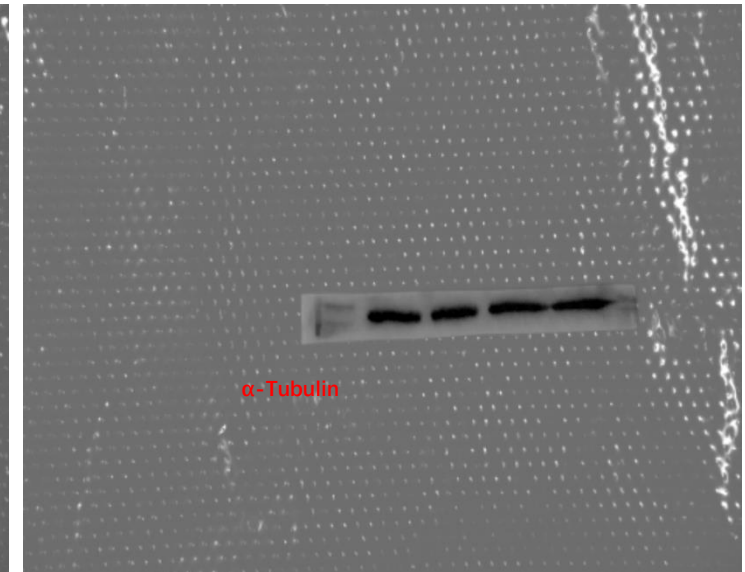

Figure 4B

1

2

3

$\alpha$ -tubulin

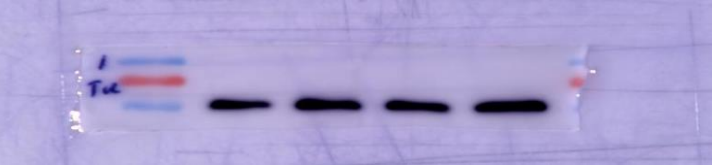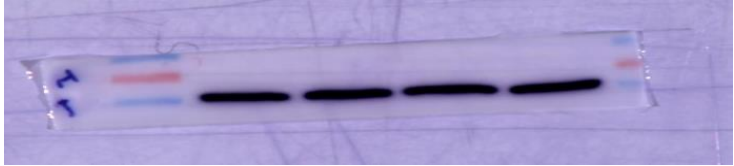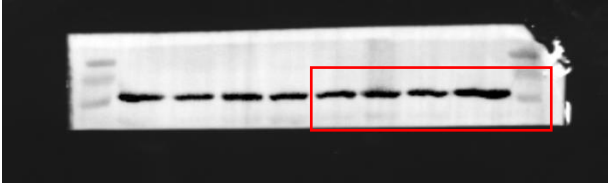

PCNA

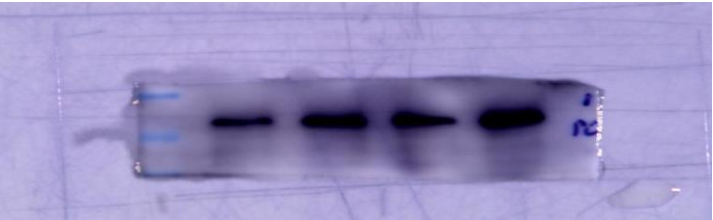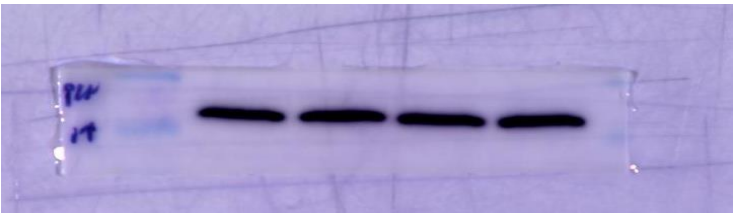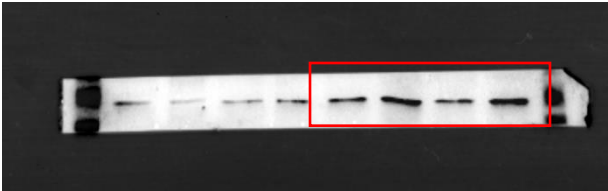

Figure 4B

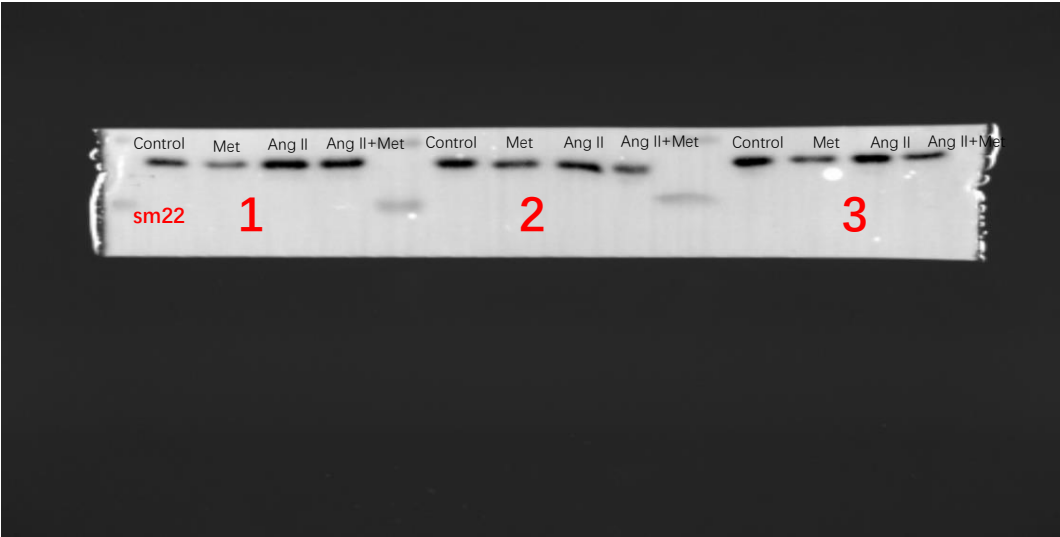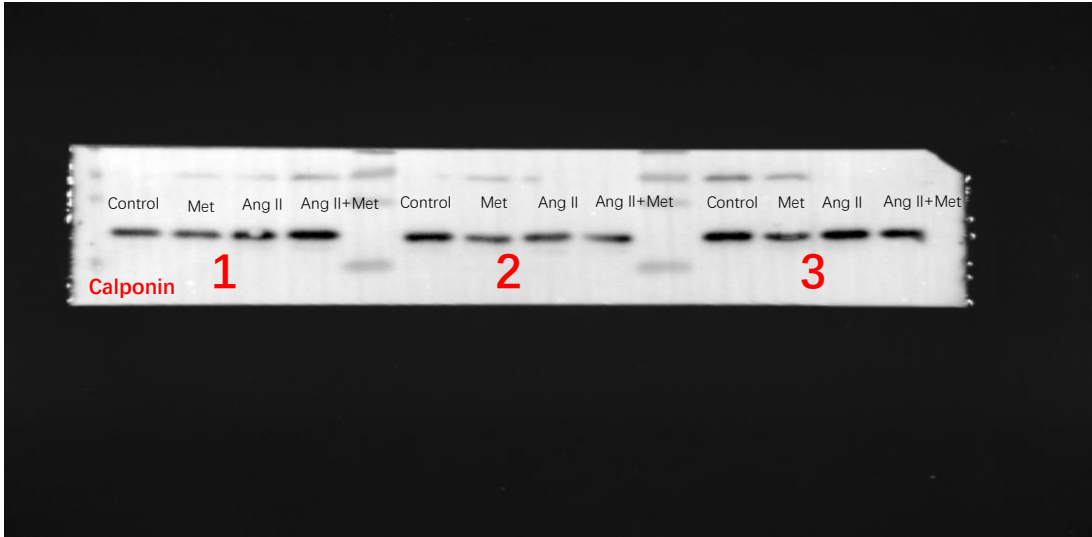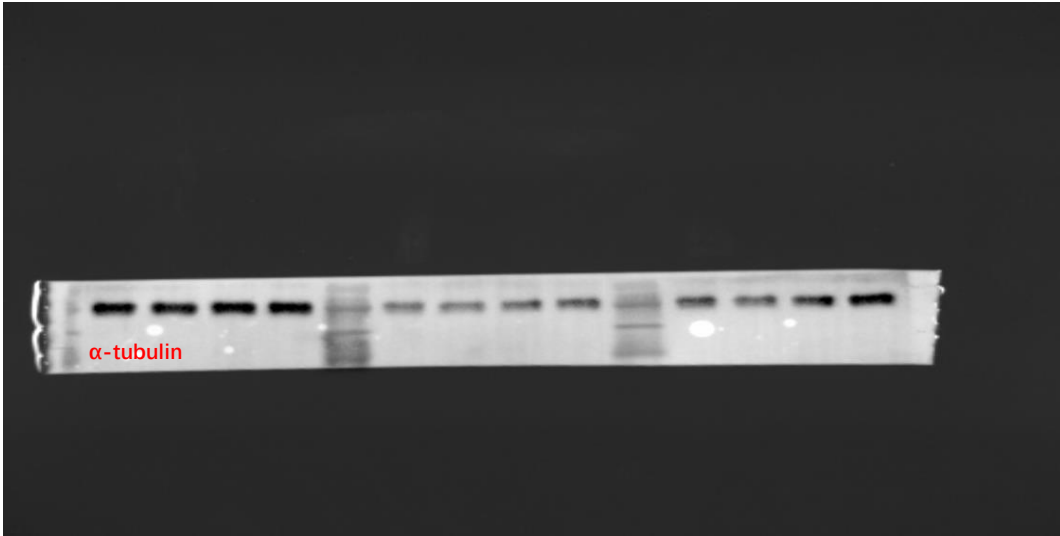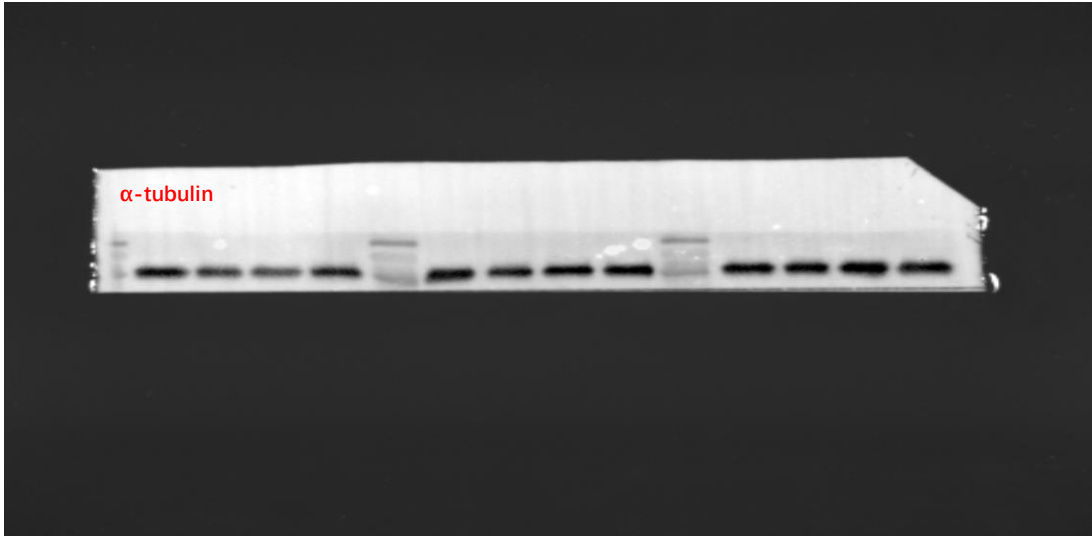



Figure 5H

Mouse 1      Mouse 2

Mouse 3-5

LC3

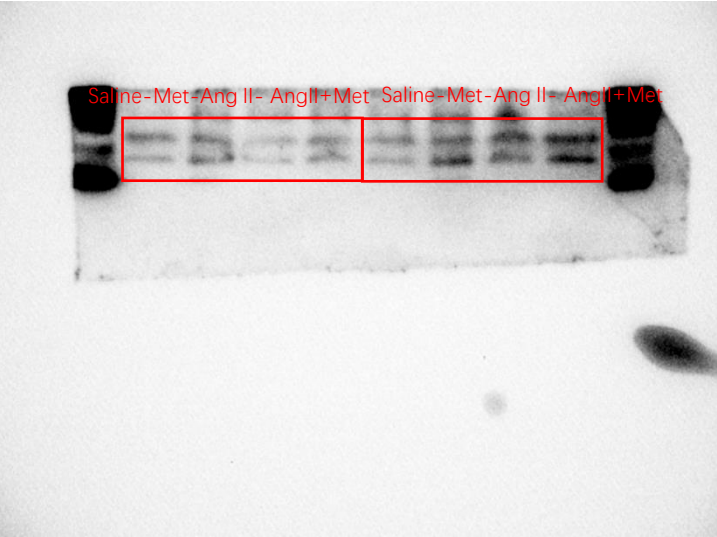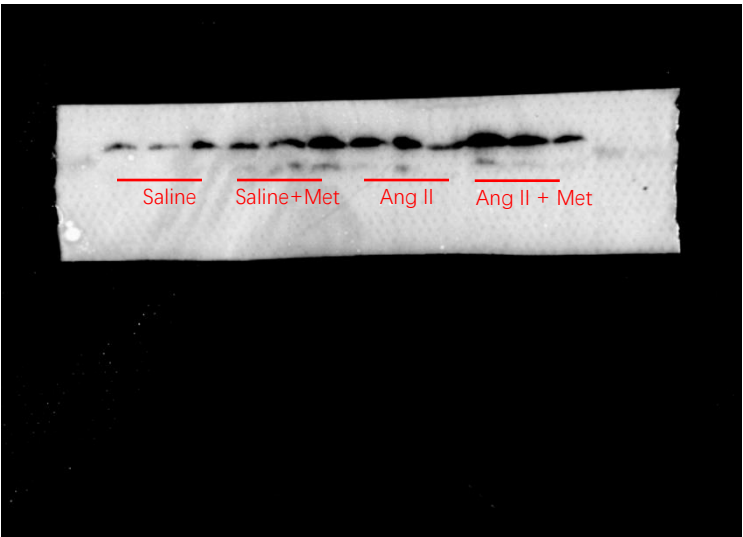

$\alpha$ -tubulin

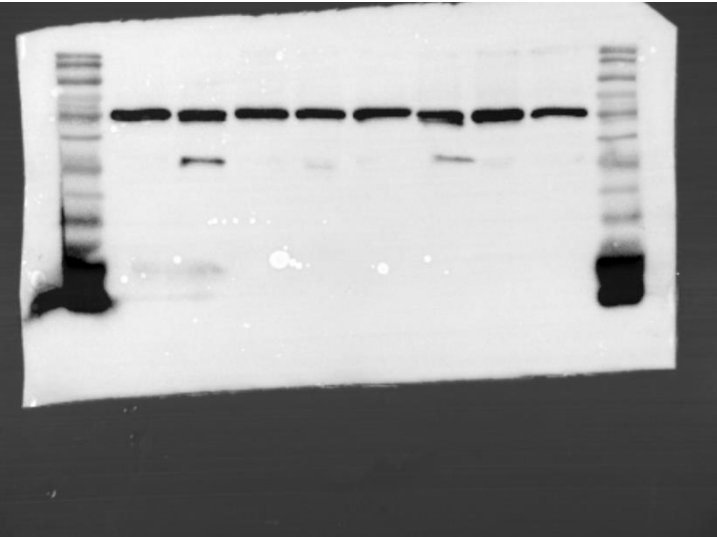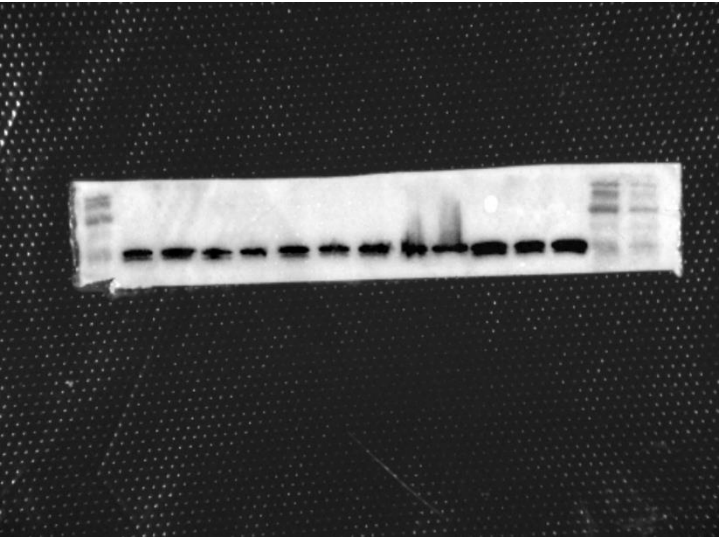

Figure 5H

Mouse 1

Mouse 2

Mouse 3-5

p62

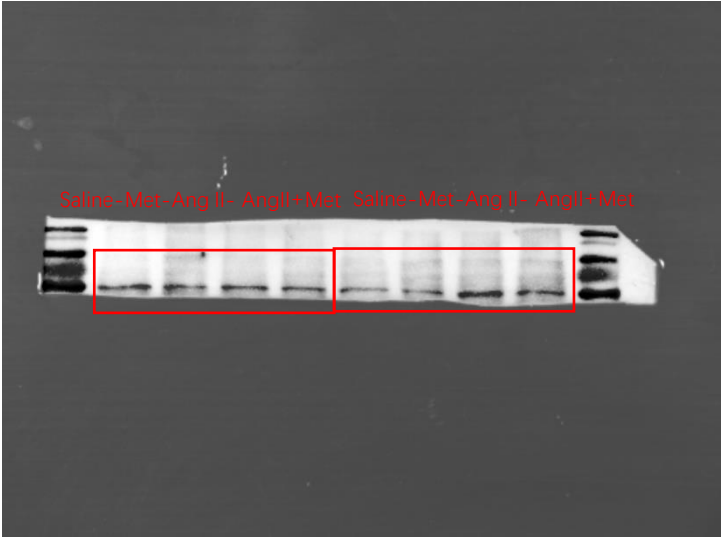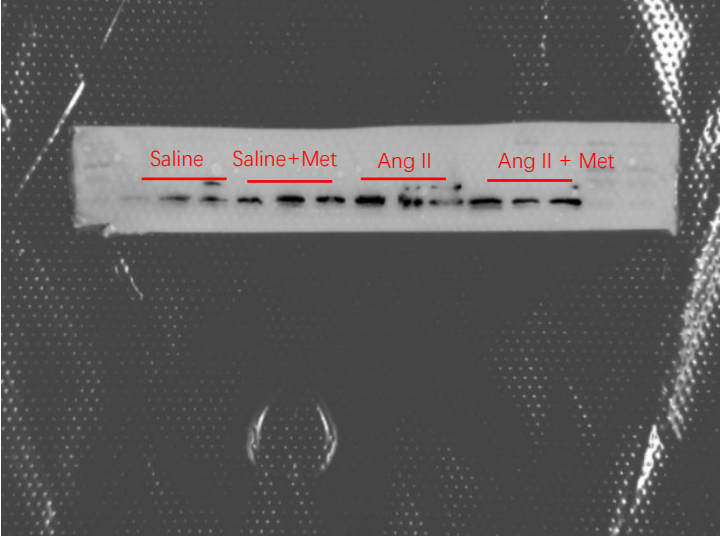

$\alpha$ -tubulin

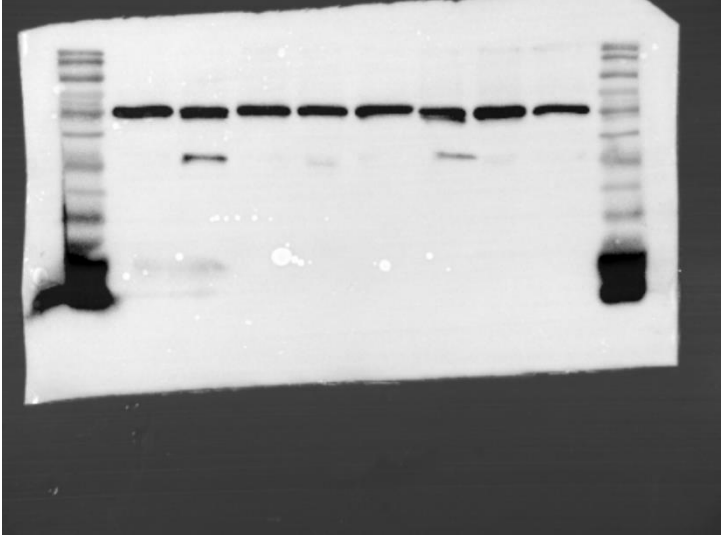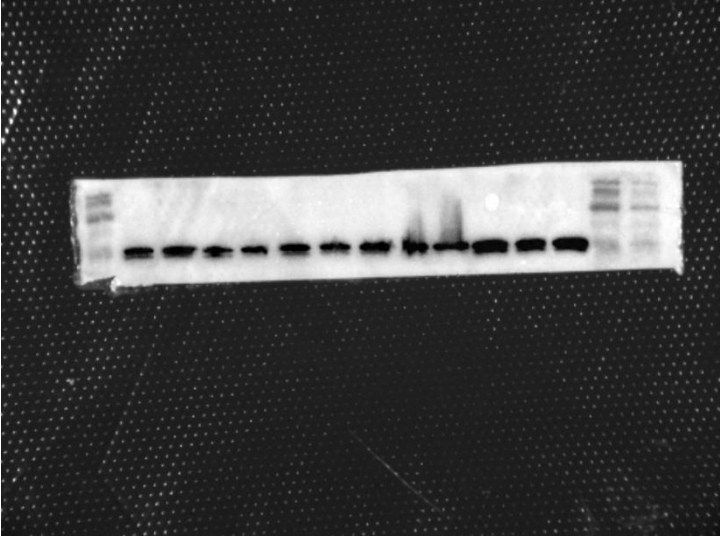

Figure 6A

1

2

3

LC3

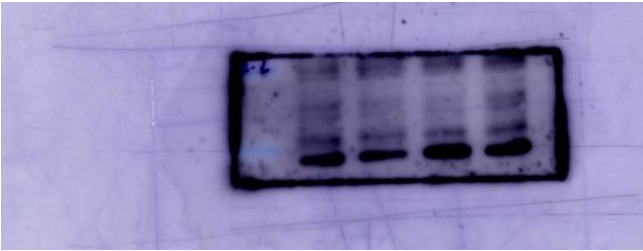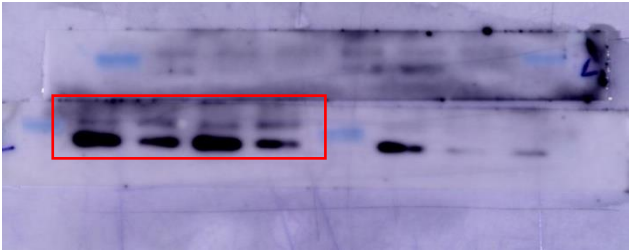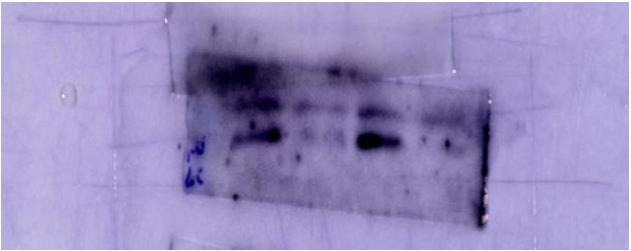

GAPDH

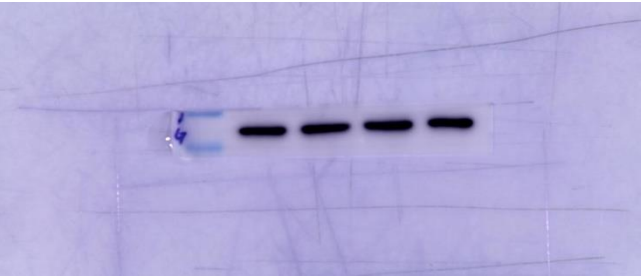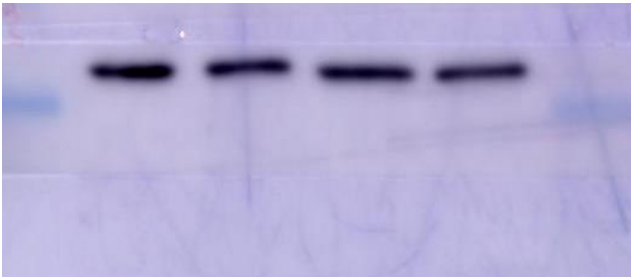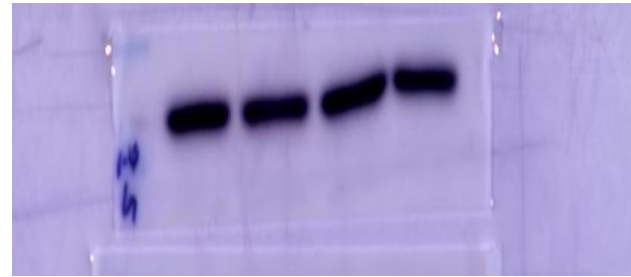

Figure 6A

1

2

3

p62

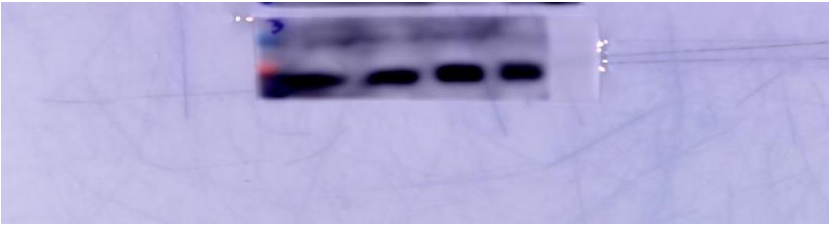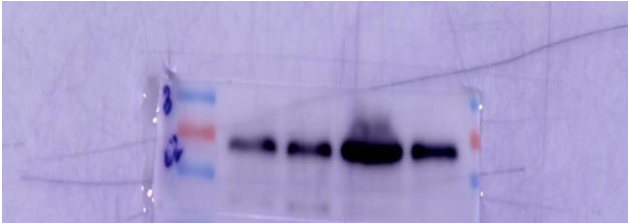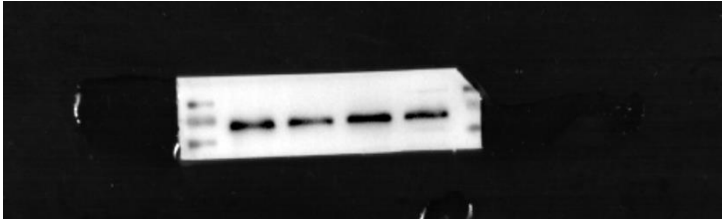

GAPDH

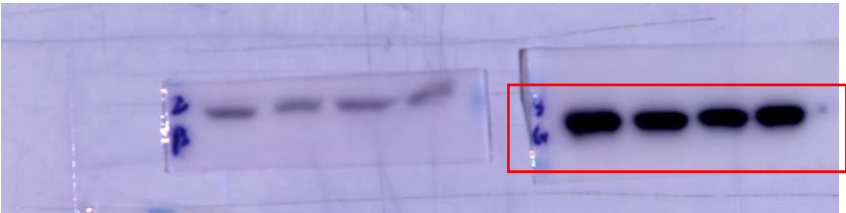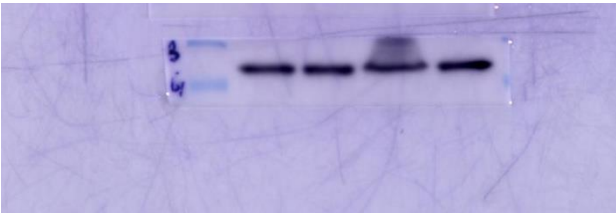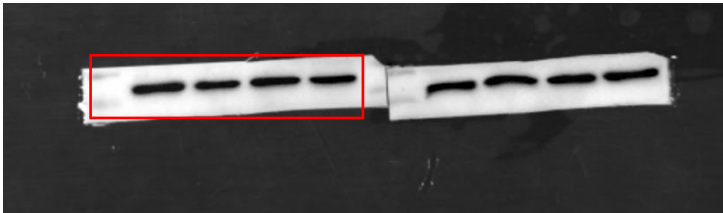

Figure 6D

1

2

3

4

5

LC3

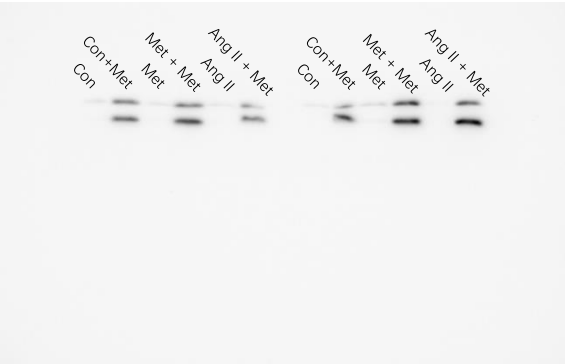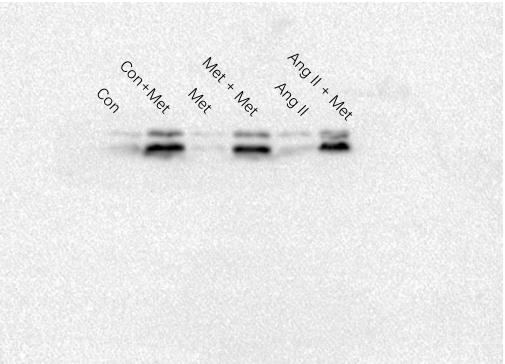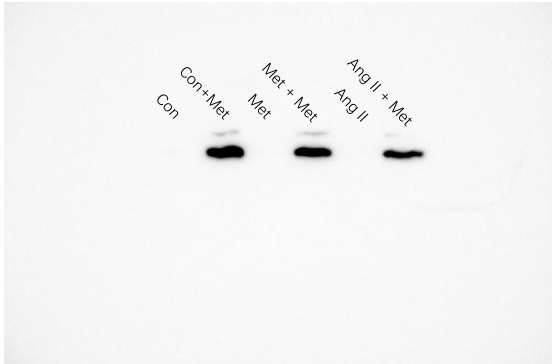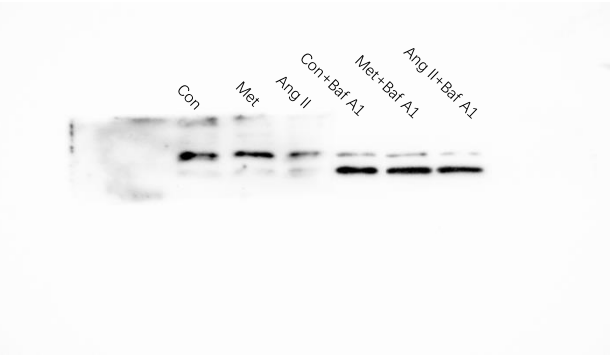

GAPDH

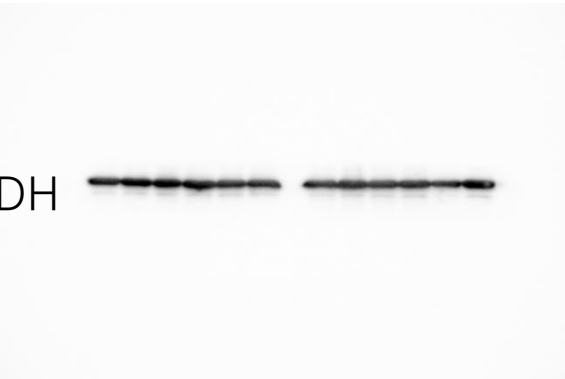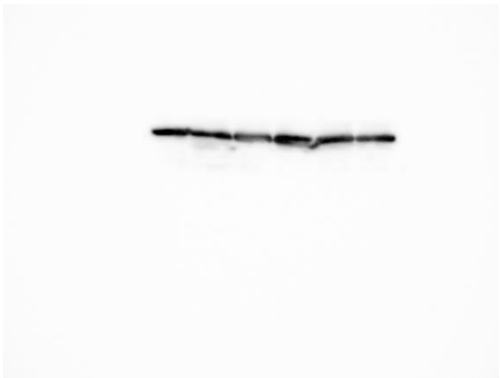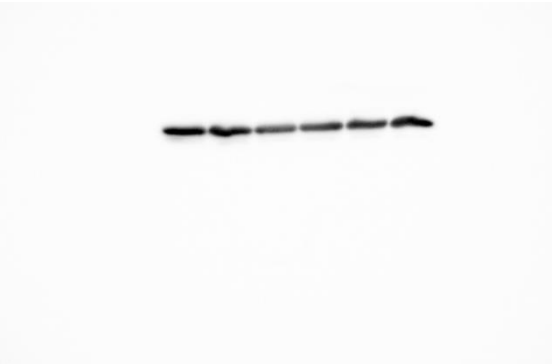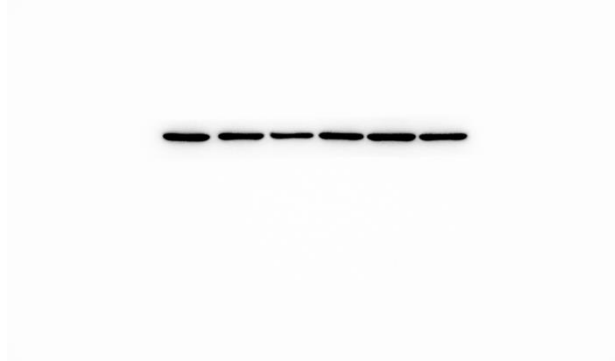

Figure 6F

p-AMPK

AMPK

GAPDH

1

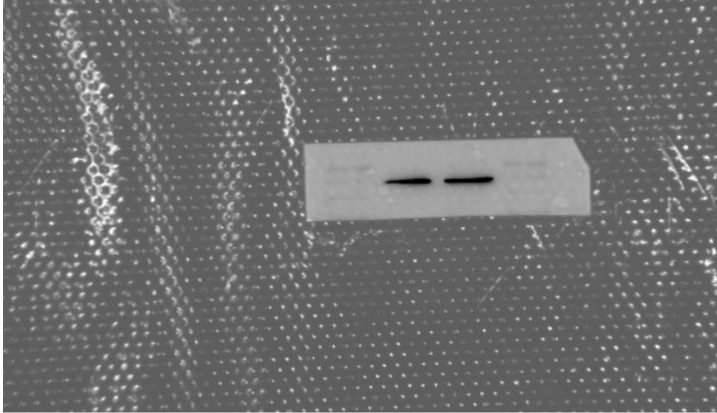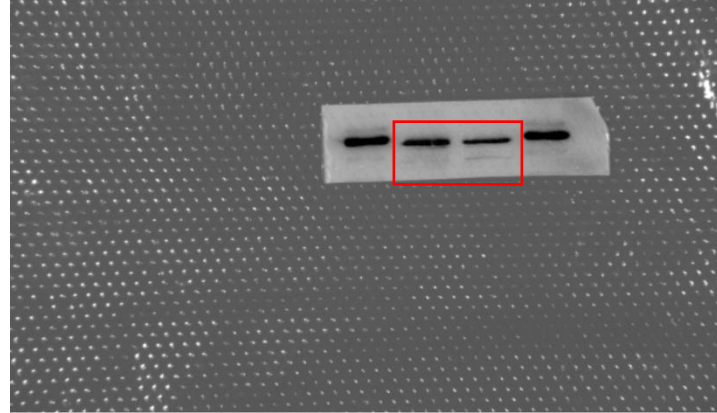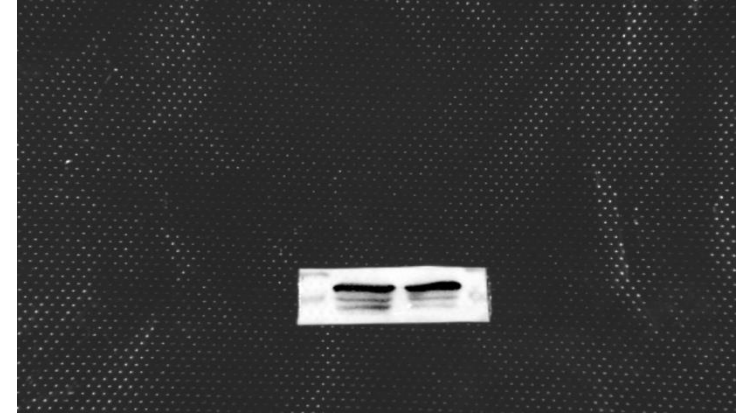

2

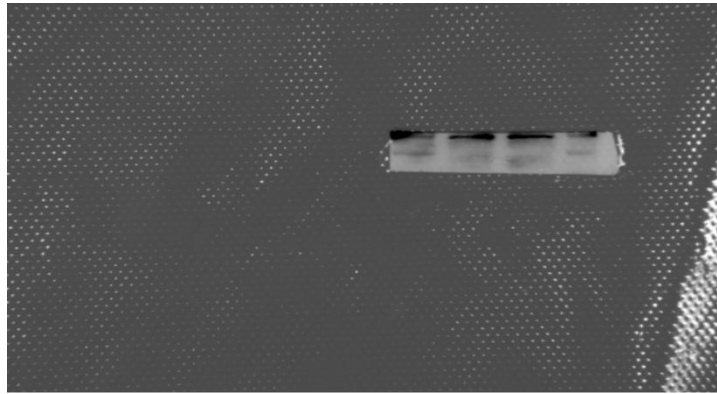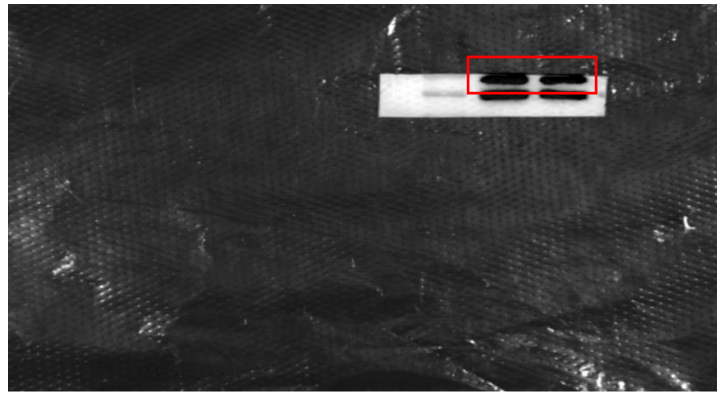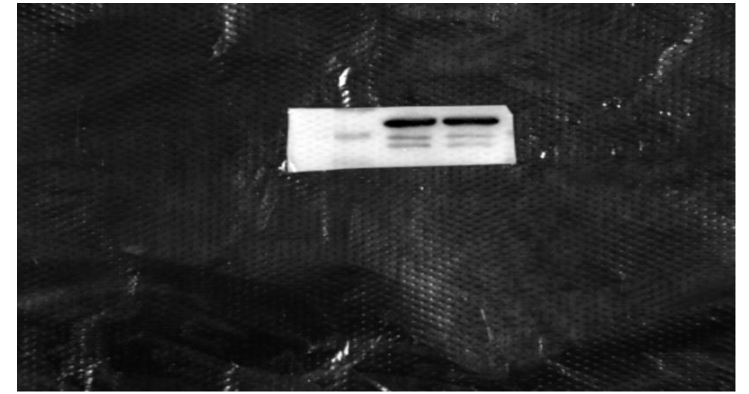

3

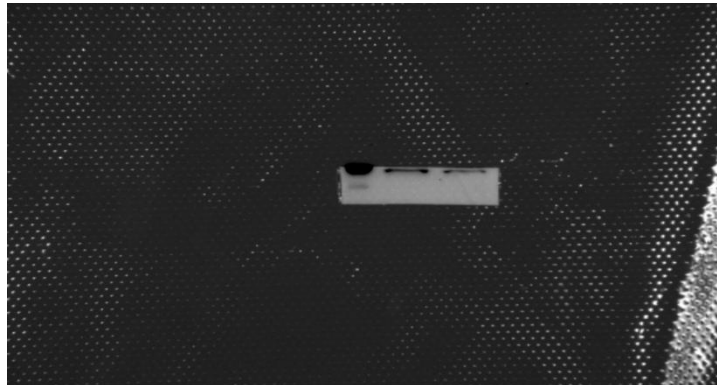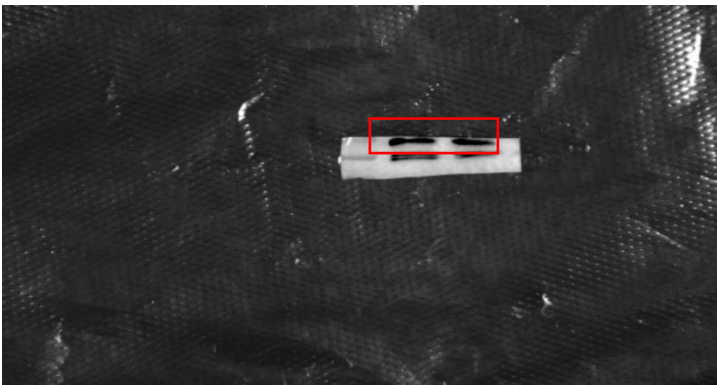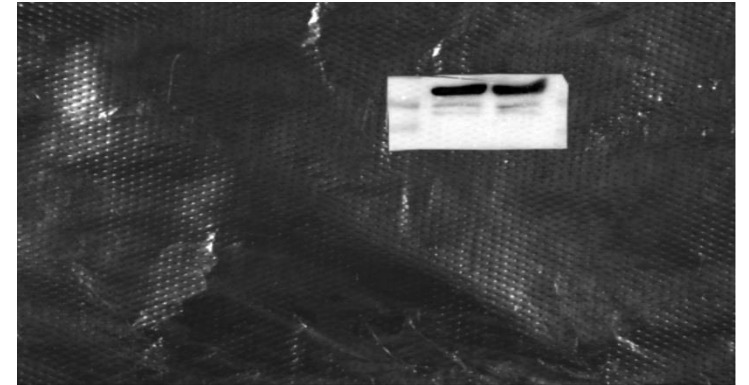

Figure 6G

p-AMPK

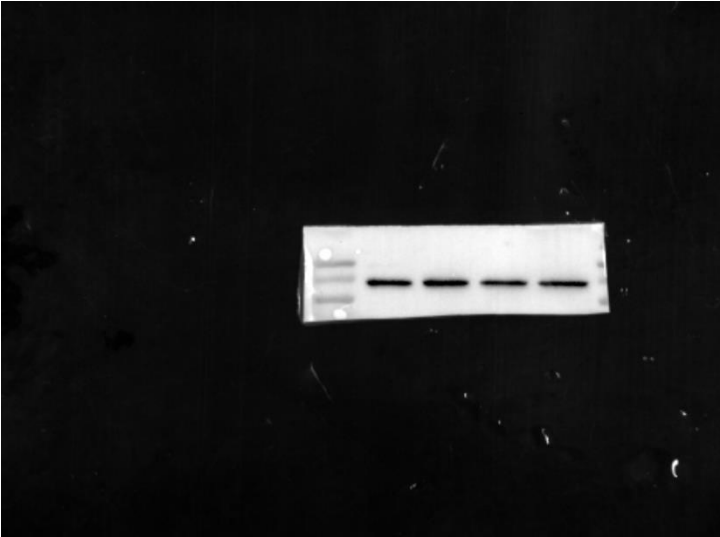

AMPK

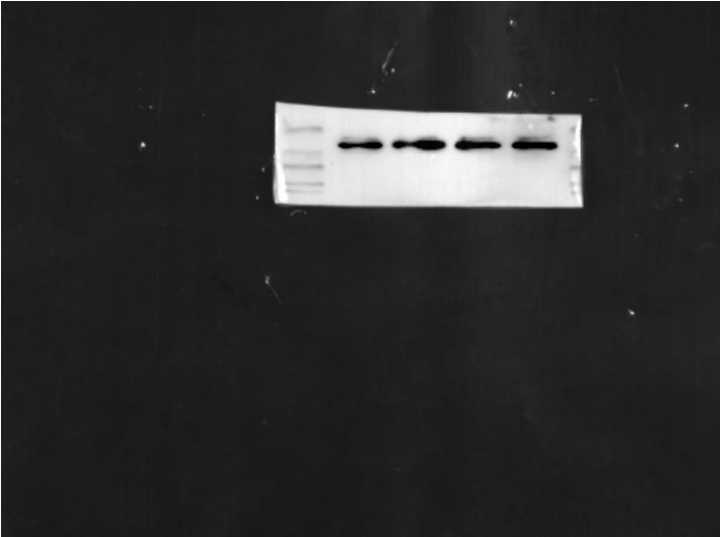

GAPDH

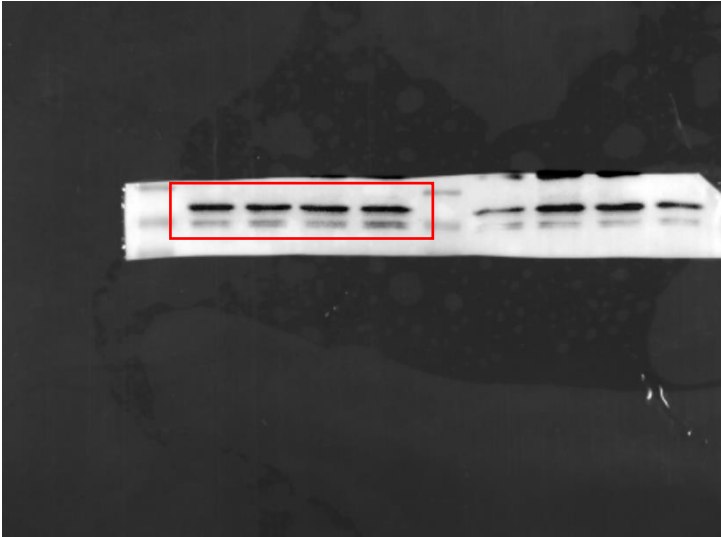

Figure 6I

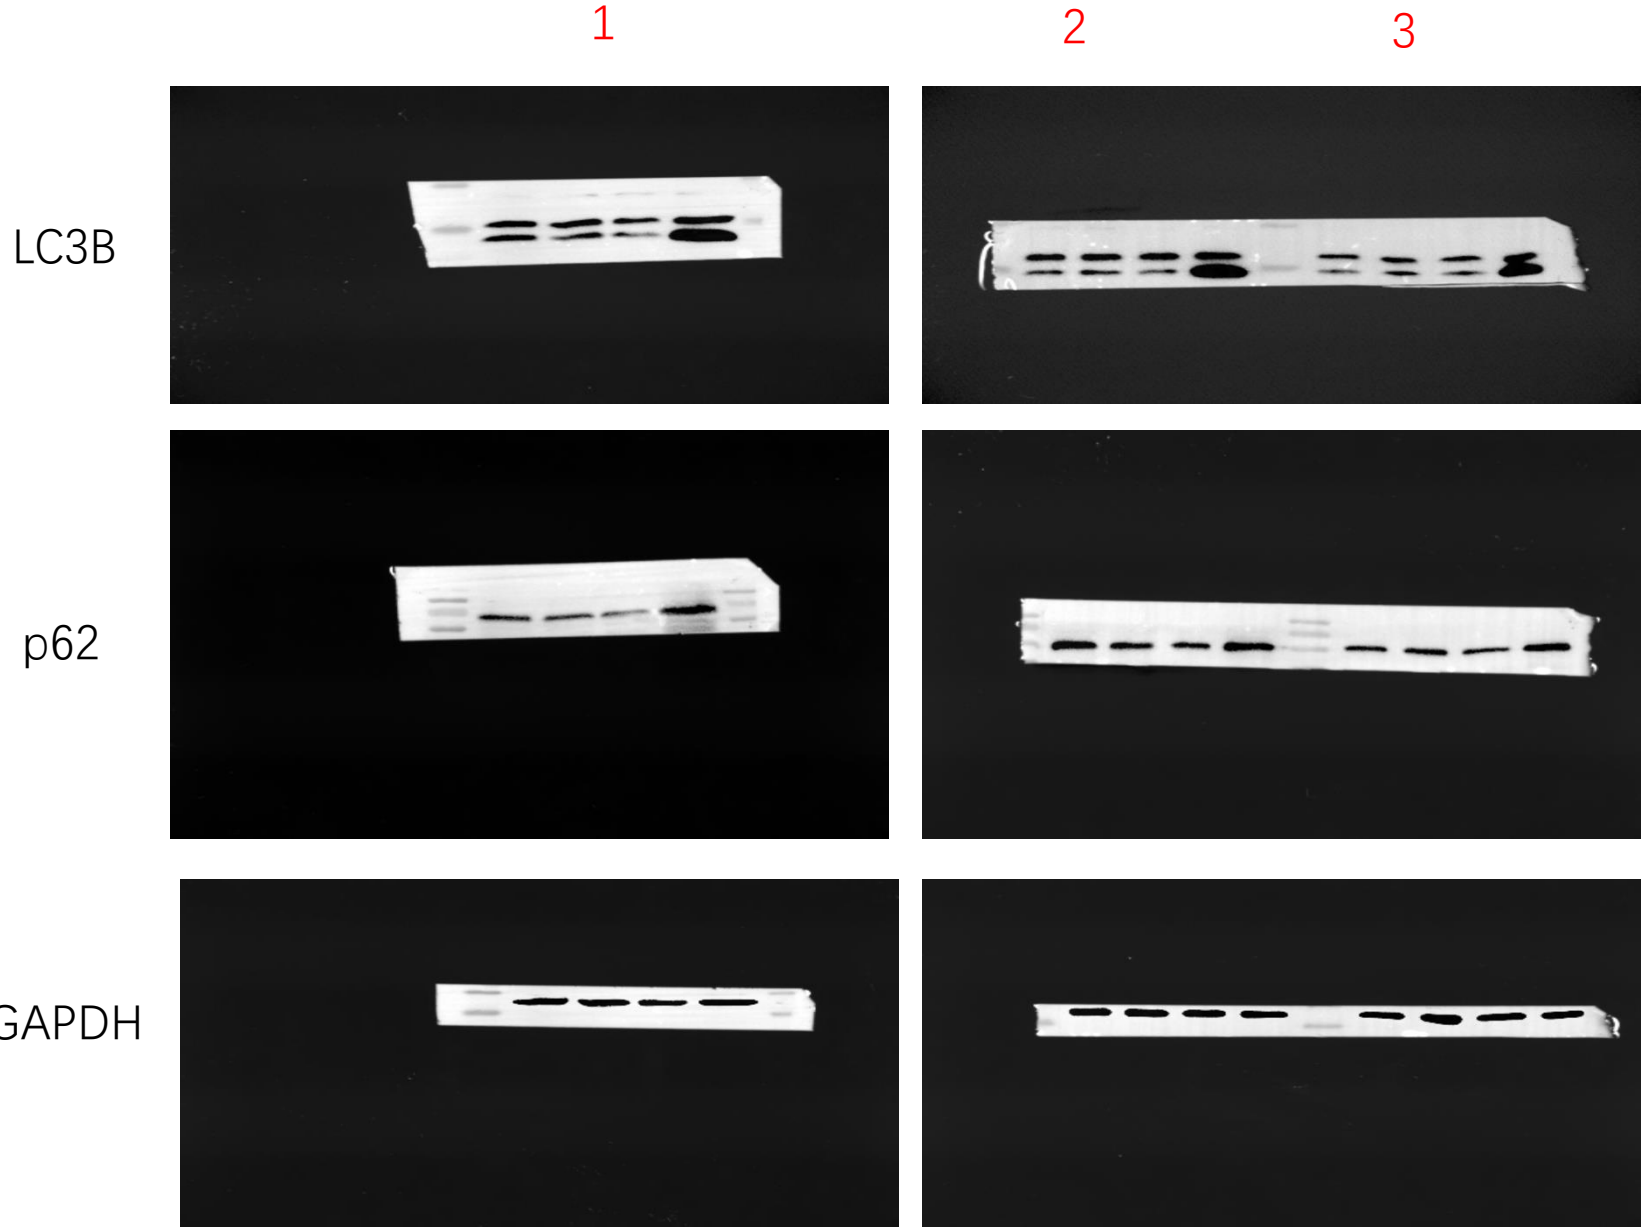



Figure 6I

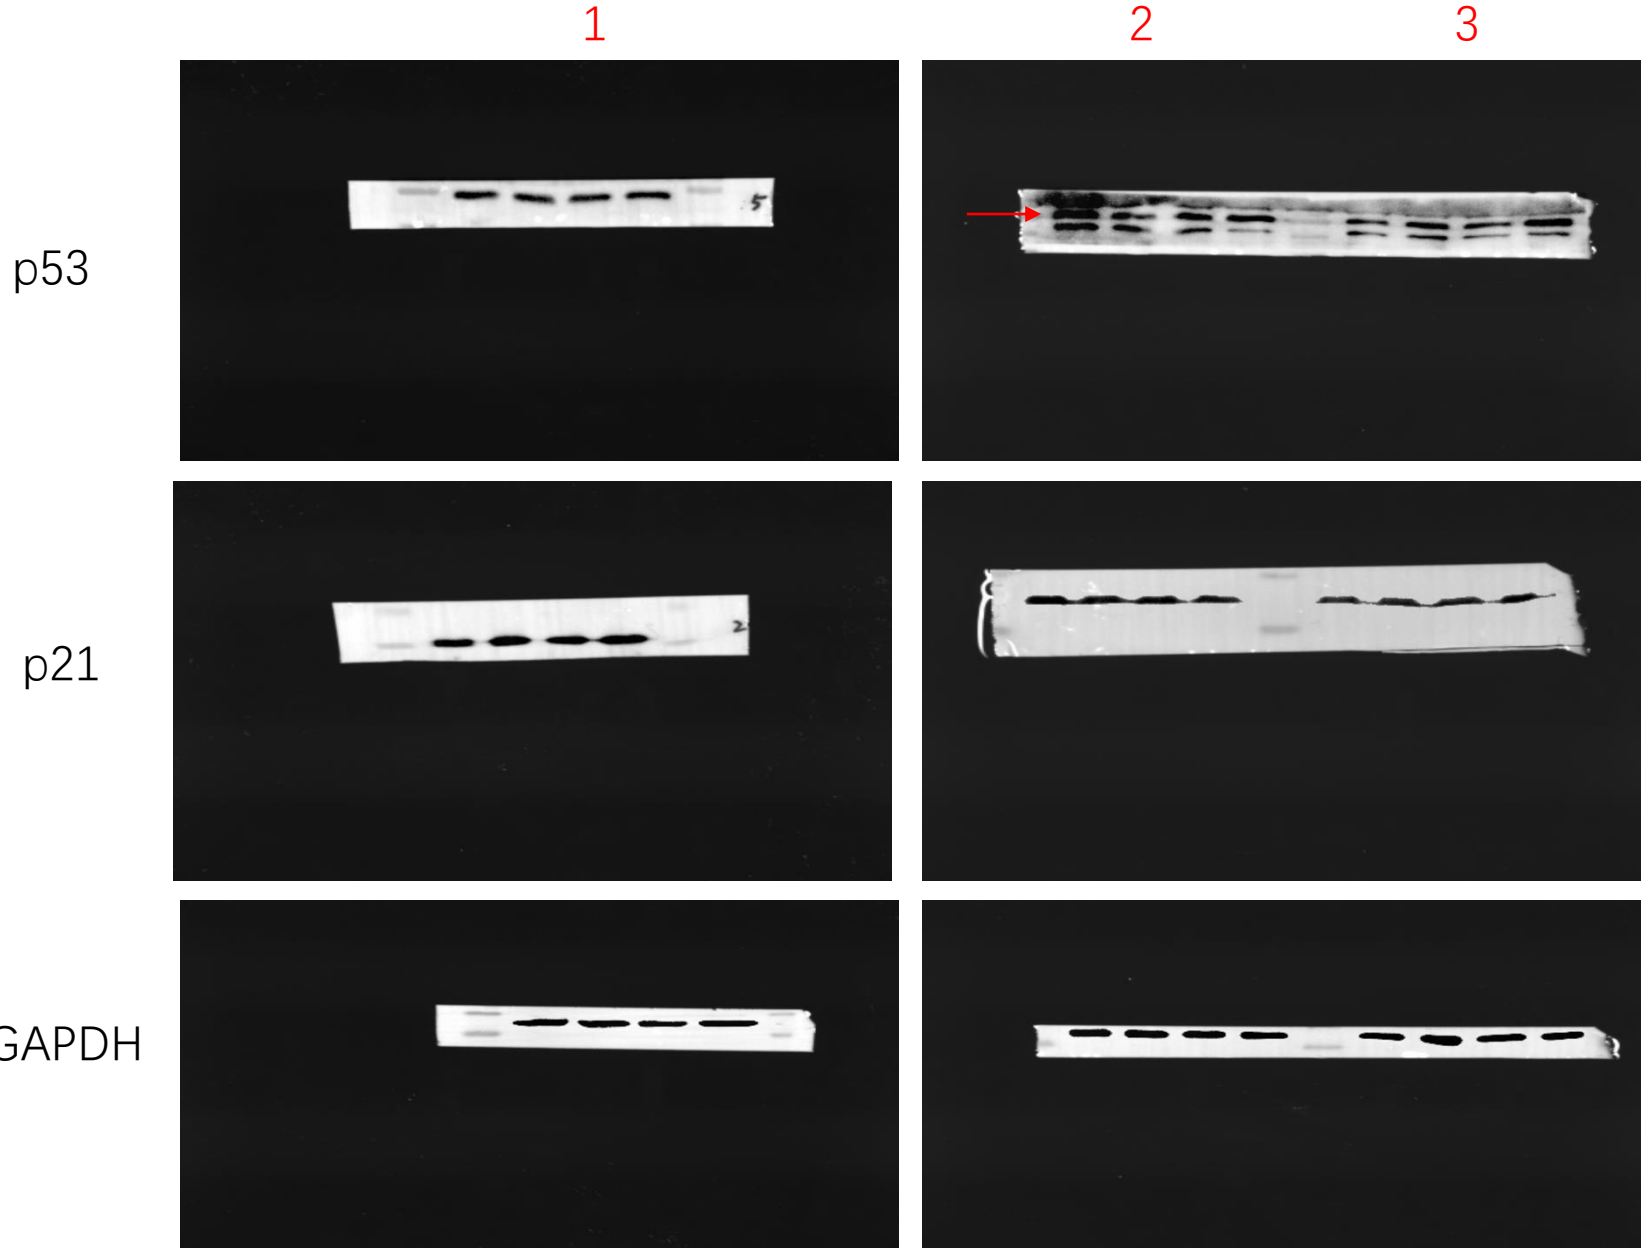

Figure 6J

1

2

3

LAMP1

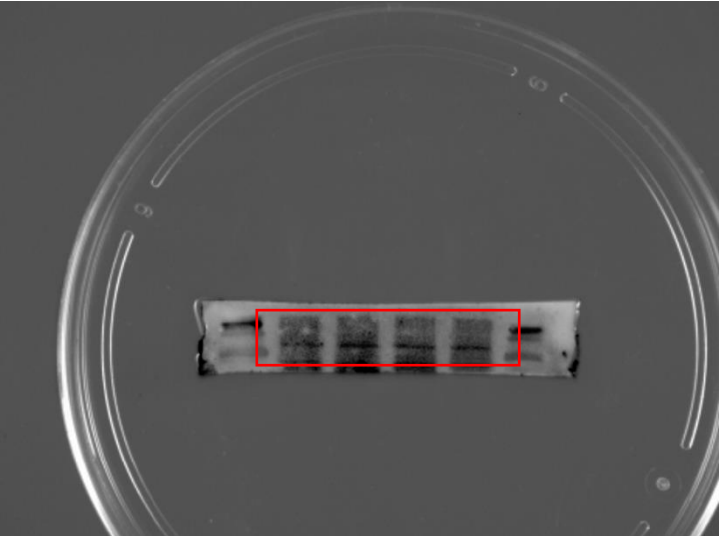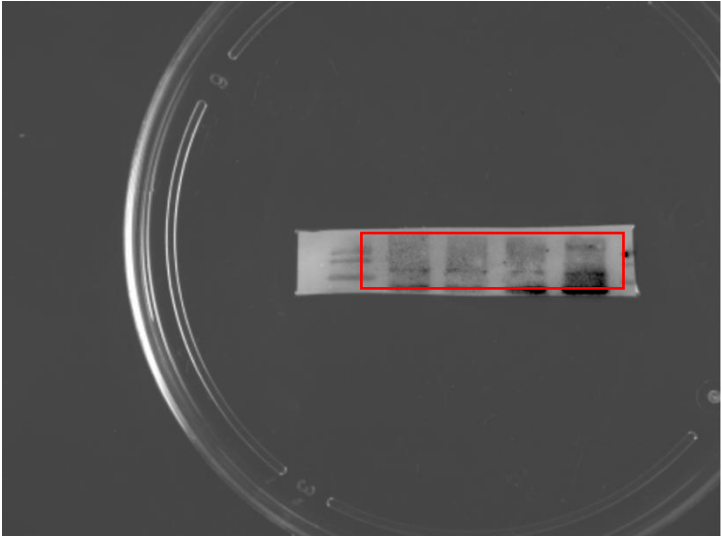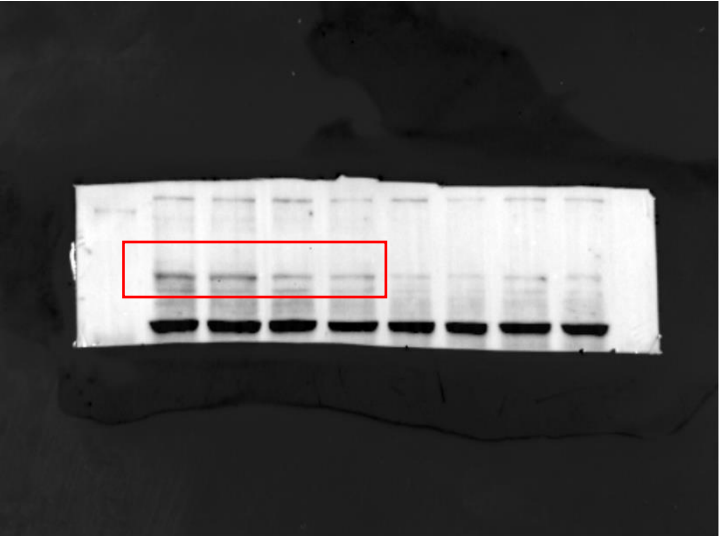

$\alpha$ -tubulin

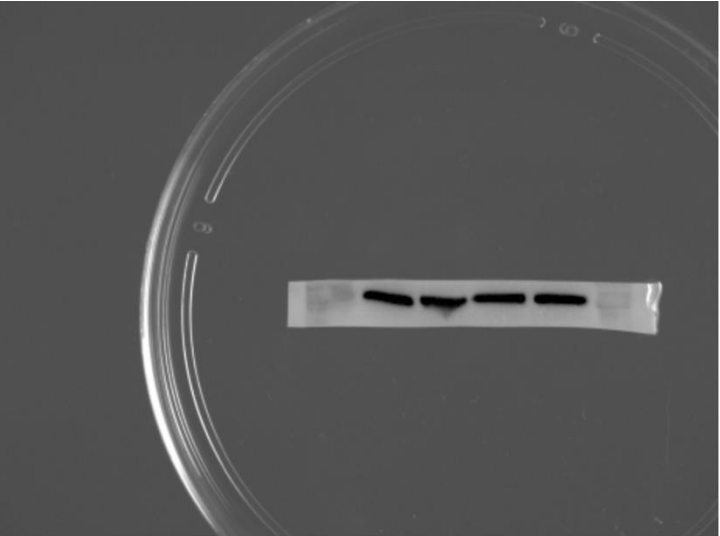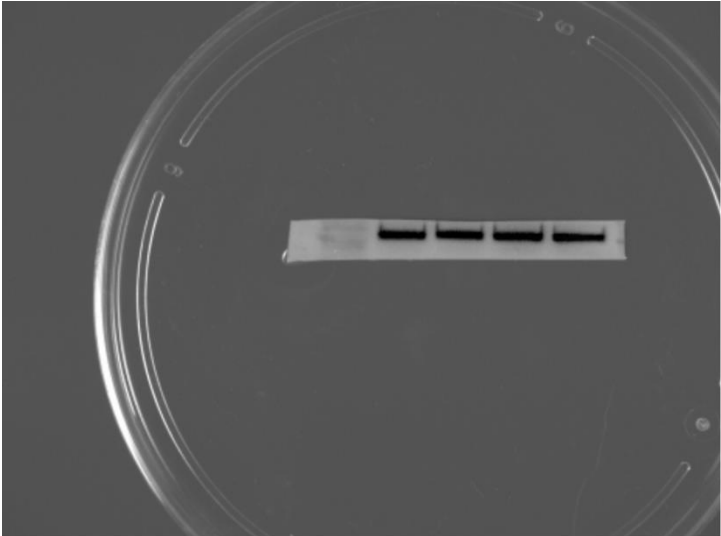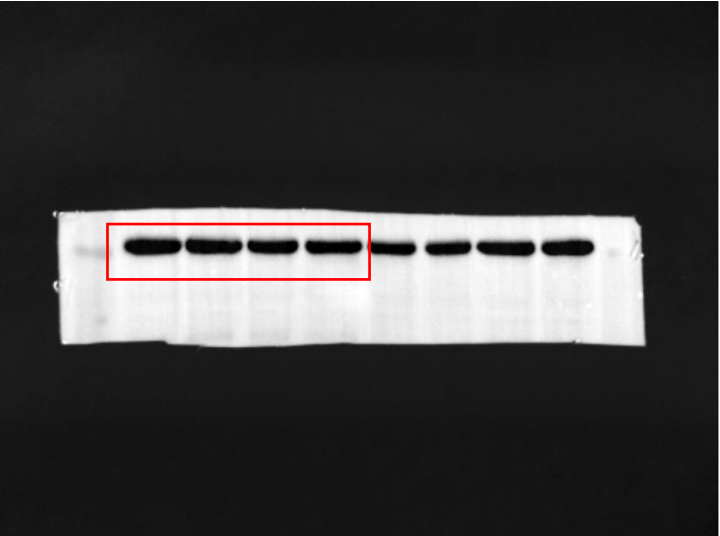

Figure 6J

1

2

3

CTSL

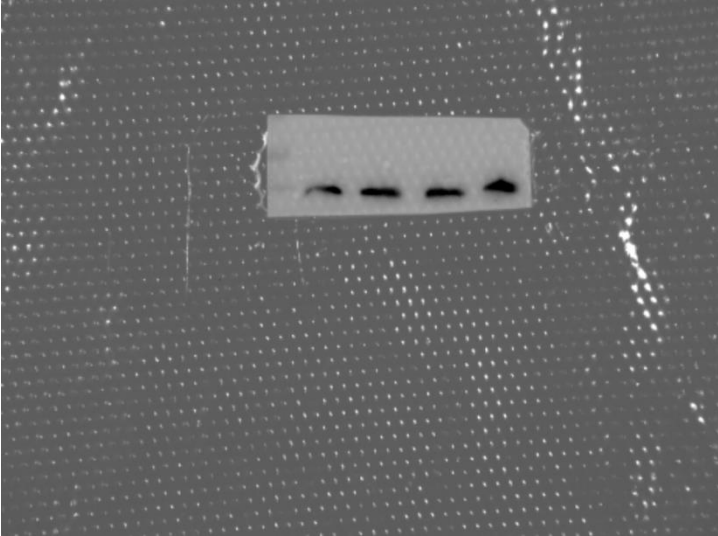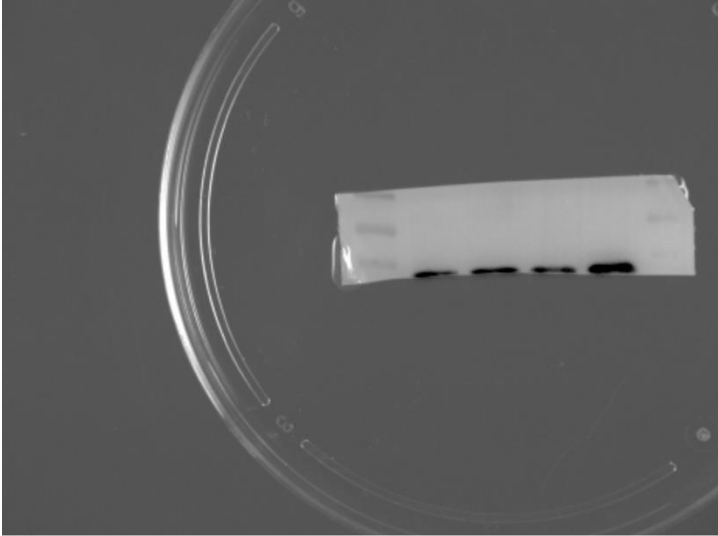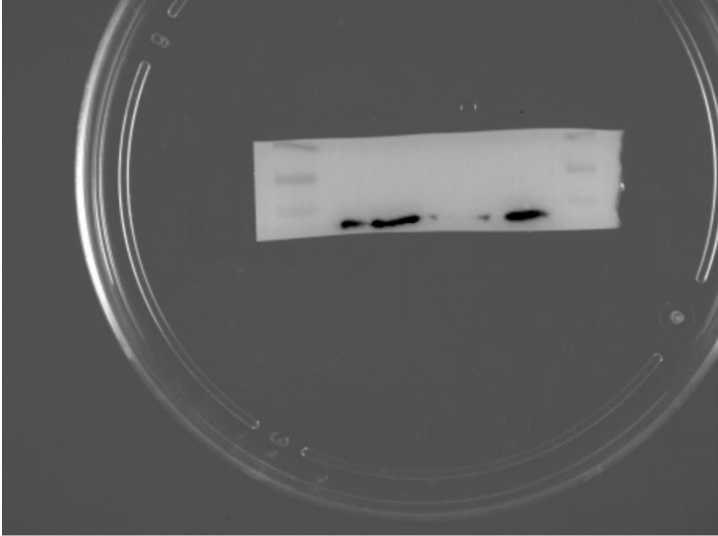

$\alpha$ -tubulin

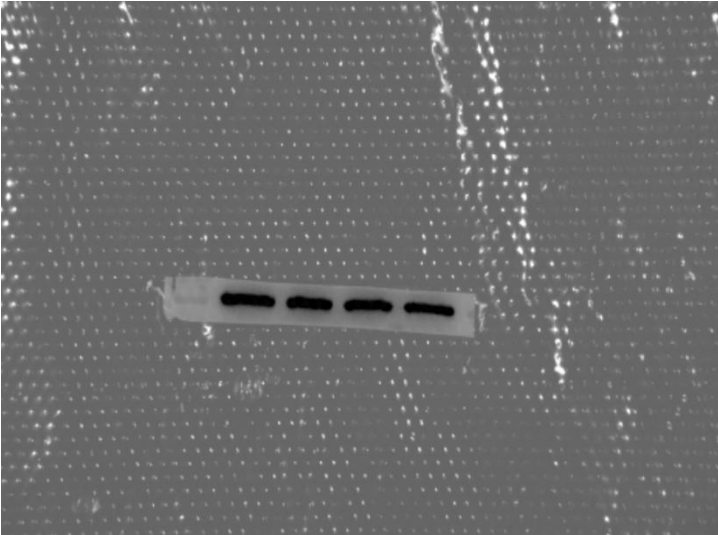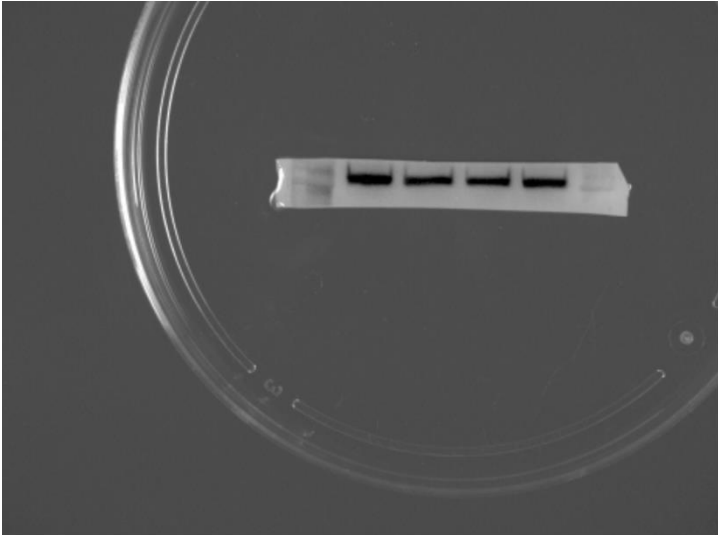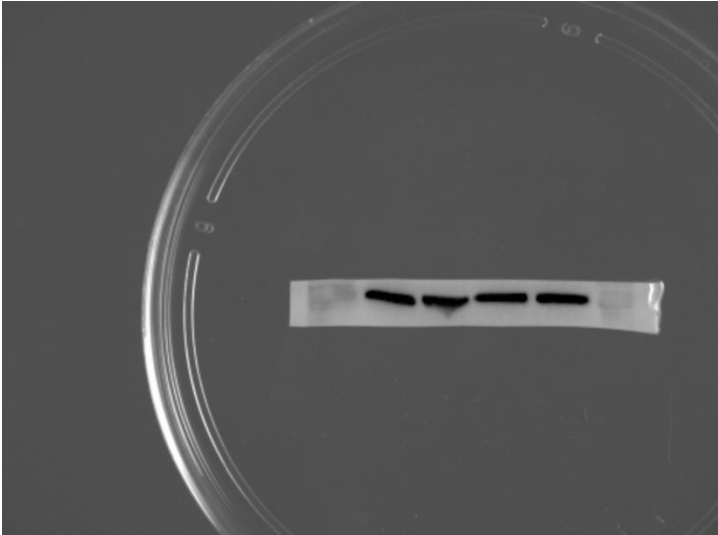

Figure 6J

1

2

3

4

CTSB

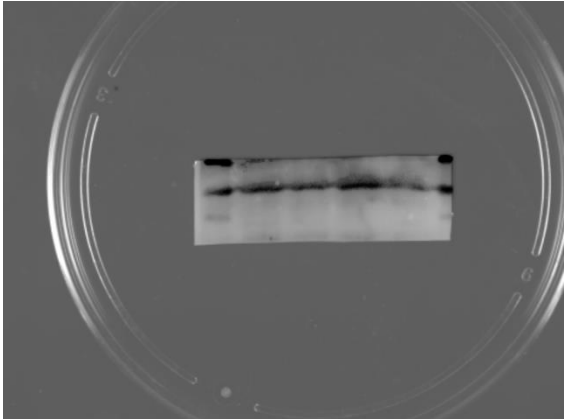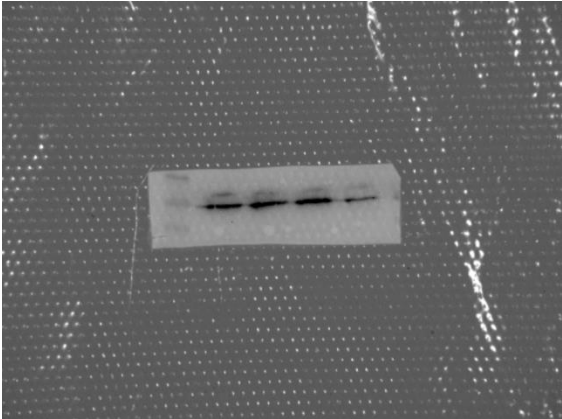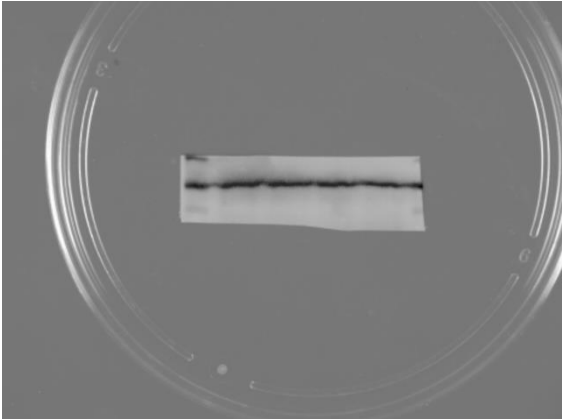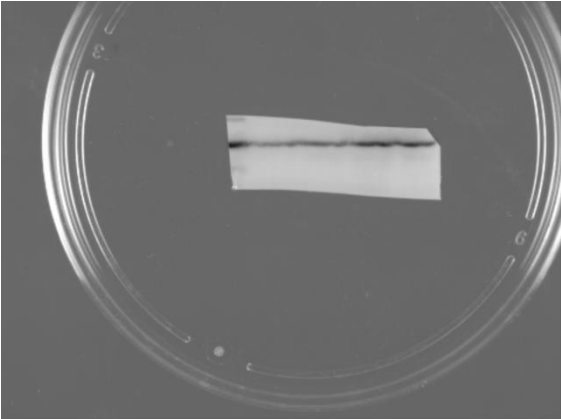

$\alpha$ -tubulin

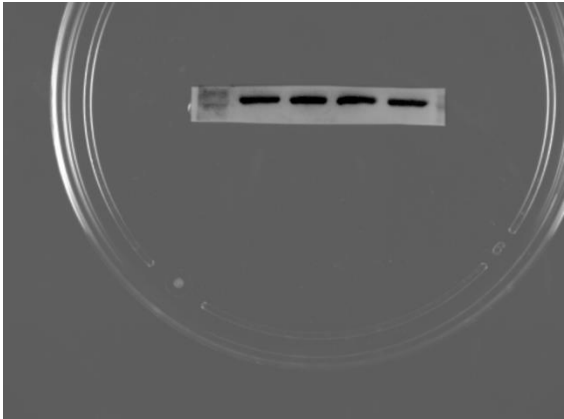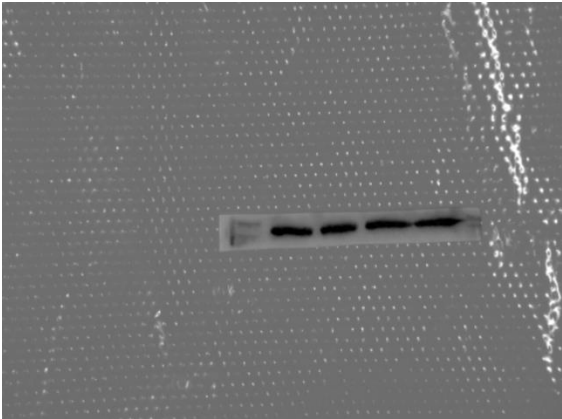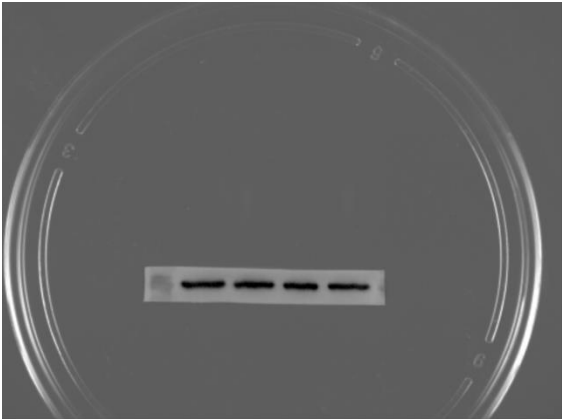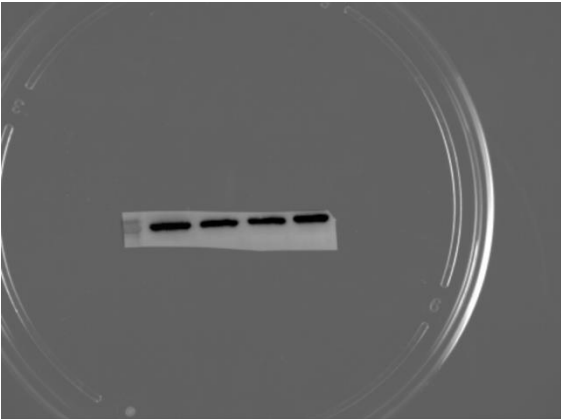

Supplement: mmc2.pdf [file mmc2.pdf]
